# Supplementary material
Source: PubMed Central journal article supplement (PMC6680165)
Supplement: EMBR-20-e48269-s001.pdf [file EMBR-20-e48269-s001.pdf]

# Appendix

## Table of Contents

|                                |           |
|--------------------------------|-----------|
| <b>Vector Report .....</b>     | <b>1</b>  |
| <b>ES Cell Report .....</b>    | <b>10</b> |
| <b>Animal Report .....</b>     | <b>18</b> |
| <b>Appendix Table S1 .....</b> | <b>30</b> |
| <b>Appendix Table S2 .....</b> | <b>30</b> |

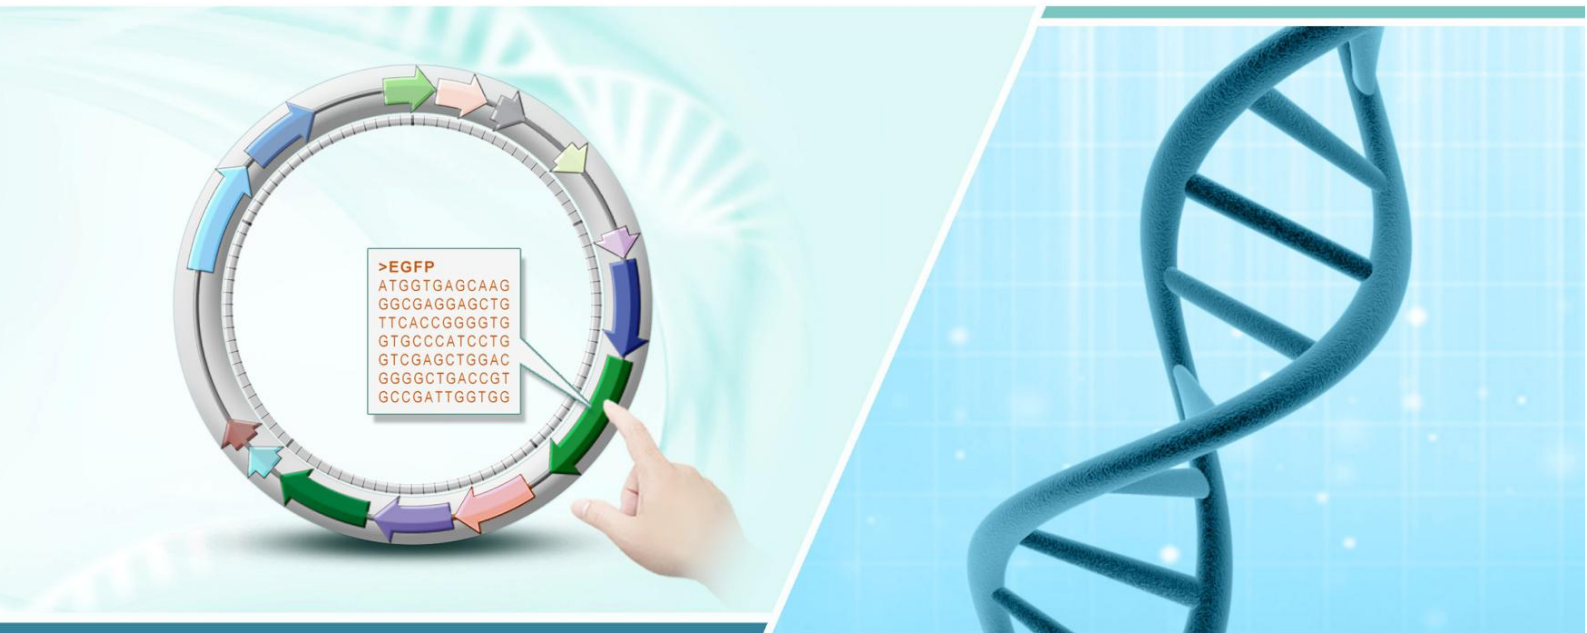

# Vector Report

Project: Mouse Uty Constitutive Knockin

## 1. Quote

TKK-171122-AMW-01

## 2. Gene

Uty

## 3. Objective

To create a mouse Uty constitutive knockin model in C57BL/6 mice

## 4. Summary

- The Uty gene (NCBI Reference Sequence: NM\_009484.3) is located on mouse chromosome Y. Twenty-seven exons have been identified, with the ATG start codon in exon 1 and the TAA stop codon in exon 27.
- In the targeting vector, the KI sequence was inserted into intron 2 of mouse Uty gene in the reverse orientation.
- In the targeting vector, the Neo cassette was flanked by loxP sites. DTA will be used for negative selection.
- C57BL/6 ES cells will be used for gene targeting.

### Wildtype allele

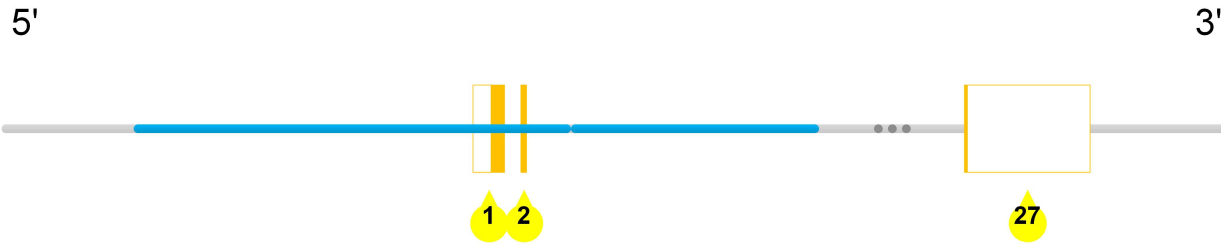

### Targeting vector

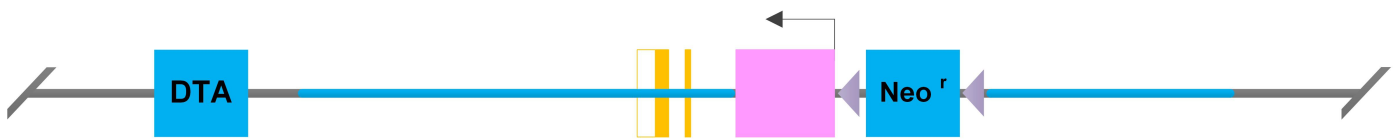

### Targeted allele

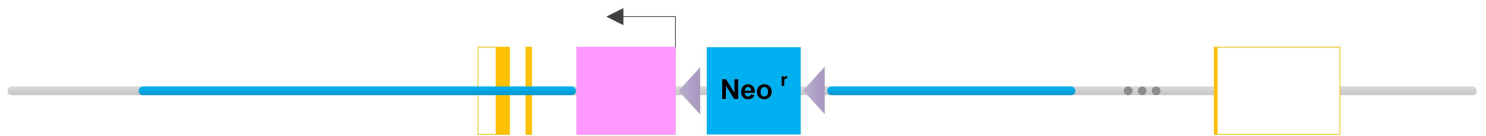

### Constitutive KI allele (After Neo deletion)

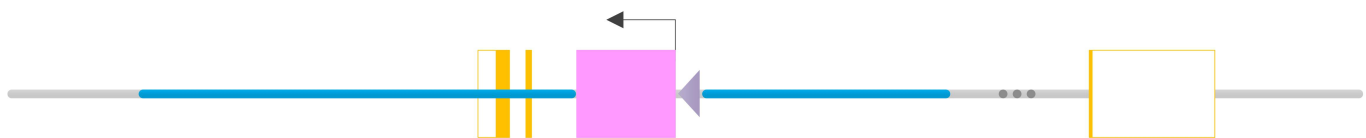

### Legends

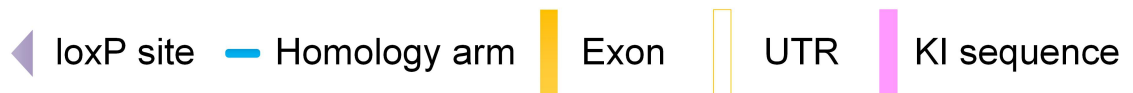

## 5. Method

Mouse genomic fragments containing homology arms (HAs) were amplified from BAC clone by using high fidelity Taq DNA polymerase, and were sequentially assembled into a targeting vector together with recombination sites and selection markers shown below.

### Diagram

Linearized targeting vector

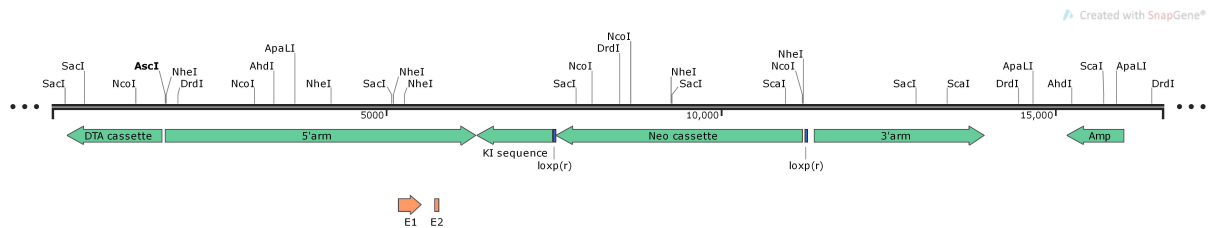

✂ Vector Linearization - AscI

## 6. Result

Your targeting vector was digested by restriction enzymes for confirmation purposes. Units below are all in kilo-base pair (kb).

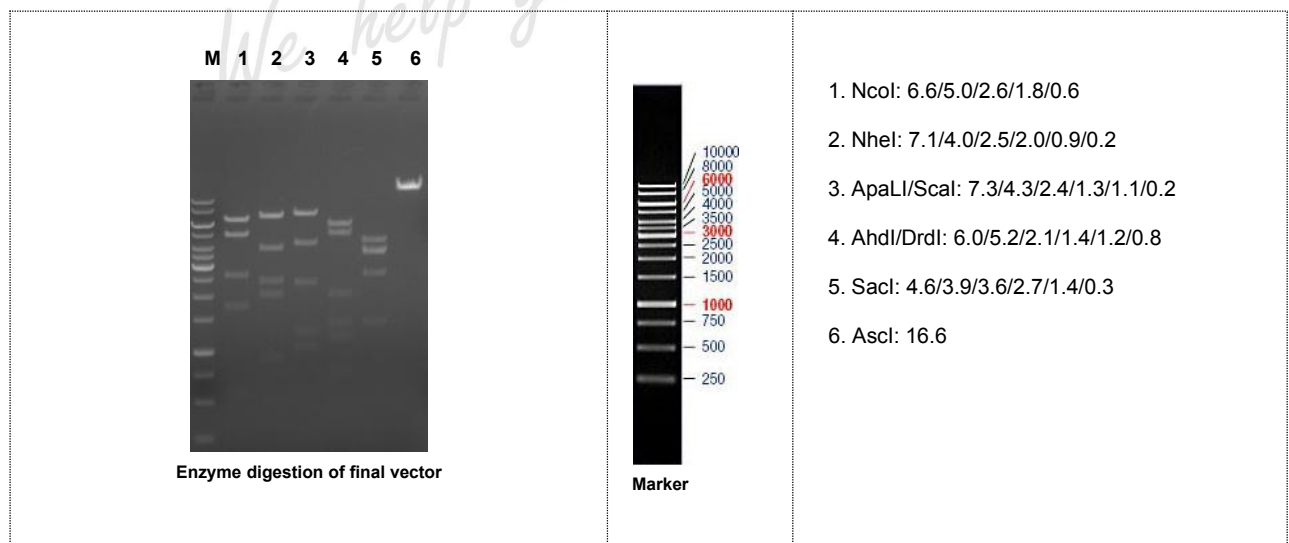

## 7. Sequence of the Final Targeting Vector

|      | Homology arms | KI region | loxP sites | Exons  | Sequence confirmed regions |         |        |        |         |        |
|------|---------------|-----------|------------|--------|----------------------------|---------|--------|--------|---------|--------|
| 1    | CGCTTA        | CAATTT    | CCATTC     | GCCATT | CAGGCT                     | GCGCAA  | CTGTTG | GGAAGG | GCGATC  | GGTGCG |
| 61   | GGCCTC        | TTCGCT    | ATTACG     | CCAGCT | GGCGAA                     | AGGGGG  | ATGTGC | TGCAAG | GCGATT  | AAGTTG |
| 121  | GGTAAC        | GCCAGG    | GTTTTT     | CCAGTC | ACGACG                     | TTGTAA  | AACGAC | GGCCAG | TGAATT  | GTAATA |
| 181  | CGACTC        | ACTATA    | GGGCGA     | ATTGGA | GCTCCA                     | CCGCCC  | GGGCTG | GTTCTT | TCCGCC  | TCAGAA |
| 241  | GCCATA        | GAGCCC    | ACCGCA     | TCCCCA | GCATGC                     | CTGCTA  | TTGTCT | TCCCAA | TCCTCC  | CCCTTG |
| 301  | CTGTCC        | TGCCCC    | ACCCCA     | CCCCCC | AGAATA                     | GAATGA  | CACCTA | CTCAGA | CAATGC  | GATGCA |
| 361  | ATTTCC        | TCATTT    | TATTAG     | GAAAGG | ACAGTG                     | GGAGTG  | GCACCT | TCCAGG | GTCAAG  | GAAGGC |
| 421  | ACGGGG        | GAGGGG    | CAAACA     | ACAGAT | GGCTGG                     | CAACTA  | GAAGGC | ACAGTC | GAGGCT  | GATCAG |
| 481  | CGAGTG        | CTAGGA    | TCTGCA     | TTCCAC | CACTGC                     | TCCCAT  | TCATCA | GTTCCA | TAGGTT  | GGAATC |
| 541  | TAAAAT        | ACACAA    | ACAATT     | AGAATC | AGTAGT                     | TTAACA  | CATTAT | ACAAAT | AAAAAT  | TTTATA |
| 601  | TTTACC        | TTAGAG    | CTTTAA     | ATCTCT | GTAGGT                     | AGTTTG  | TCCAAT | TATGTC | ACACCA  | CAGAAG |
| 661  | TAAGGT        | TCCTTC    | ACAAAG     | AGATCG | CCTGAC                     | ACGATT  | TCCTGC | ACAGGC | TTGAGC  | CATATA |
| 721  | CTCATA        | CATCGC    | ATCTTG     | GCCACG | TTTTCC                     | ACGGGT  | TTCAAA | ATTAAT | CTCAAG  | TTCTAC |
| 781  | GCTTAA        | CGCTTT    | CGCCTG     | TTCCCA | GTTATT                     | AATATA  | TTCAAC | GCTAGA | ACTCCC  | CTCAGC |
| 841  | GAAGGG        | AAGGCT    | GAGCAC     | TACACG | CGAAGC                     | ACCATC  | ACCGAA | CCTTTT | GATAAA  | CTCTTC |
| 901  | CGTTCC        | GACTTG    | CTCCAT     | CAACGG | TTCAGT                     | GAGACT  | TAAACC | TAACTC | TTTCTT  | AATAGT |
| 961  | TTCGGC        | ATTATC    | CACTTT     | TAGTGC | GAGAAC                     | CTTCGT  | CAGTCC | TGGATA | CGTCAC  | TTTGAC |
| 1021 | CACGCC        | TCCAGC    | TTTTCC     | AGAGAG | CGGGTT                     | TTCATT  | ATCTAC | AGAGTA | TCCCGC  | AGCGTC |
| 1081 | GTATTT        | ATTGTC    | GGTACT     | ATAAAA | CCCTTT                     | CCAATC  | ATCGTC | ATAATT | TCCTTG  | TGTACC |
| 1141 | AGATTT        | TGGCTT    | TTGTAT     | ACCTTT | TTGAAT                     | GGAAATC | TACATA | ACCAGG | TTTAGT  | CCCGTG |
| 1201 | GTACGA        | AGAAAA    | GTTTTT     | CATCAC | AAAAGA                     | TTTAGA  | AGAATC | AACAAC | ATCATC  | AGGATC |
| 1261 | CATGGC        | ACGCGC    | TTCTAC     | AAGGCG | CTGGCC                     | GAAGAG  | GTGCGG | GAGTTT | CACGCC  | ACCAAG |
| 1321 | ATCTGC        | GGCACG    | CTGTTG     | ACGCTG | TTAAGC                     | GGGTGC  | CTGCAG | GGTCGC | TCGGTG  | TTCGAG |
| 1381 | GCCACA        | CGCGTC    | ACCTTA     | ATATGC | GAAGTG                     | GACCTG  | GGACCG | CGCCGC | CCCGAC  | TGCATC |
| 1441 | TGCGTG        | TTCGAA    | TTCGCC     | AATGAC | AAGACG                     | CTGGGC  | GGGGTT | TGCTCG | ACATTG  | GGTGGA |
| 1501 | AACATT        | CCAGGC    | CTGGGT     | GGAGAG | GCTTTT                     | TGCTTC  | CTCTTG | CAAAAC | CACACT  | GCTCGA |
| 1561 | CATTGG        | GTGGAA    | ACATTC     | CAGGCC | TGGGTG                     | GAGAGG  | CTTTTT | GCTTCC | TCTTGA  | AAACCA |
| 1621 | CACTGC        | TCGATT    | TGTTAG     | CAGCCT | CGAATC                     | AACCCG  | GGCGAT | CCTAGG | CATGTA  | GATCTA |
| 1681 | GCTGTC        | GCGAAG    | AGTGGC     | GCGCCA | CCACCG                     | CCCAGC  | TAGCTT | TCTTAA | ATTAAG  | CAGTTT |
| 1741 | CTGTCA        | GTGTTA    | GGGATT     | TTTACC | TGCAAT                     | TCCATC  | ATATTT | GAATAC | TCTGTG  | ACTGAG |
| 1801 | ACTGTT        | AGGGTC    | CAGTAA     | TAGCCA | TACAAA                     | CCCCTC  | AGAAGC | CAATCT | CAGTCA  | TGTATC |
| 1861 | AATGGT        | TTATTG    | AACACA     | TTCCTA | GACTGA                     | TTAGTC  | AGGAGT | GGGGAT | CGAAAA  | CTTCAA |
| 1921 | TAAGGC        | ATTCCT    | CAGAAC     | CAATTT | TTATAT                     | GGGAAA  | AACAAG | GACTTG | GTACAT  | TTGCAA |
| 1981 | TGTTTA        | TAACAT    | TTGCAA     | CATTTA | TGCTAT                     | CTAGAC  | AAAGCA | GTGCTG | TCTGGC  | CTTTAA |
| 2041 | GCTGAT        | AGGCTA    | TGTATA     | GAGACA | AGGAGA                     | CAAGGA  | GACCTC | CAAAGT | TCACAA  | GGCTCA |
| 2101 | GTGAAA        | AAGTAT    | AACAAC     | TTTTTT | TCAGGG                     | CAAGAA  | ACAATA | GGTCAA | GTAAA   | TTTATG |
| 2161 | AGCTAC        | AAAATG    | AAGATT     | GAGGGA | ATATGG                     | CAGAAT  | TTTAAT | ATTTAA | CAGAGA  | AATGTC |
| 2221 | CTTAAA        | CCCCCA    | AAGAGT     | AATTTA | AAAGGG                     | TTTTTA  | TTATCA | AACACC | TTTTTC  | TGTTTT |
| 2281 | AAGATT        | CTCTAT    | GTAGAG     | TAGGTT | GCATTG                     | GACAAAT | TATCTT | TCTGGC | TTTACT  | TACTGA |
| 2341 | GTTCTG        | AAATTT    | GAAAGG     | ATTCAC | CATTAT                     | TTCTTT  | GTGGCA | AATATT | TGTCAA  | CCCCAG |
| 2401 | AACTCA        | GCAGAT    | ACAATA     | GTGGAA | GAAATA                     | AGTCAG  | CTCTTG | CTCCCT | CCCTTA  | CCTCTA |
| 2461 | TTCTCT        | AGCTCT    | TTTGCT     | CCCCTG | CTCCCC                     | CTCTCT  | CCCCAT | CCCCTT | CCTTGC  | TCTCTC |
| 2521 | TATGTG        | GTCATG    | GCTGCC     | TTCTGT | TTCTCT                     | ACTATC  | TCACAC | TCTTTG | CCTTTC  | TACAAT |
| 2581 | AAATGC        | CTTAAA    | ACCAAA     | AAATAA | AAAAAA                     | AGAAAA  | AAGTCA | GCAGAG | GAGAAAT | GAAAGG |
| 2641 | ATGGAC        | TACTAC    | TACTTC     | AGAACT | GGTTAA                     | ACCTGA  | GAATTT | TGAGGA | GAAAGA  | TTGTTT |
| 2701 | AGTTTC        | AACCCT    | TACAAG     | GGACTG | AGGTAC                     | ATATTT  | TACATA | TTAAAG | CAGTCC  | TGGCCT |
| 2761 | CCAGAT        | TCTCCT    | AGCATC     | CCTCAG | TCCCAA                     | CCTGGC  | ATTCTG | TCTCCA | AACCTA  | AACTTT |
| 2821 | TCAGGT        | CAGAGG    | CTGGGC     | TACCTT | TCCCCC                     | AGAAGC  | TTCTCC | CTATAT | AATCCA  | GACATT |
| 2881 | TGGACA        | ATGACT    | CCCCCC     | CCCATG | TCCCCC                     | TCCTTT  | TCCTTT | TCCTCC | TCTTCT  | TCCTCT |
| 2941 | TCCTCC        | CCACCT    | TGTCTT     | ATCCTC | TTTCTC                     | TCTCTC  | TGTCTA | TCTCTC | TCTCTC  | TCTTCT |
| 3001 | CCCTTC        | TCTGTG    | TACATG     | AGCTTT | CTCTCT                     | CCATGG  | TAACTT | CCCTGG | CCTCAG  | TTATTG |
| 3061 | GGGCCA        | GTGAAC    | TTGCC      | AAGAGC | AGCTTC                     | CCAATA  | AGCCTG | CCTATA | TATAAA  | ATATTA |
| 3121 | AAGACC        | TGTTCC    | ACAATA     | TCCAAC | TAAAGC                     | AAGCTT  | TATTTA | ACACTG | ACTAGG  | AAGTTC |
| 3181 | AACACT        | GACTAC    | ATTCAT     | GCCAGG | ATTCCA                     | AGAGAA  | ATGGCT | TTGAAT | TAAAAT  | CAGTCA |
| 3241 | TGTGAT        | CATGCA    | AAGAAA     | CCTCTA | CAAATC                     | TATGAA  | CTTTCC | ATATTT | GTCCAA  | TTAGGG |
| 3301 | GTAAGC        | ATACAT    | CCTCAC     | TGACTT | CCTGTC                     | TGCATA  | TTTCTC | ACCTGT | GTGTGA  | TCAAGC |
| 3361 | ATATCC        | TGAGCA    | CTTGGG     | GCAACA | AACCTT                     | GCTATT  | GAACCA | AAACAC | AACCTC  | CAGTAT |

|      |        |         |        |        |        |        |        |        |        |        |
|------|--------|---------|--------|--------|--------|--------|--------|--------|--------|--------|
| 3421 | TCTGCA | GTTATT  | TGTCCT | TAGGTA | AGTGTA | GCATAC | ACATTA | ACTTTA | AAGAAT | TCCAG  |
| 3481 | AGCTGA | TTTTTT  | GTTTGT | TTGTTT | GTTTGT | TTGTTT | GTTTGT | TTTTGA | GAGAAA | GTTTTT |
| 3541 | CTGTGT | AGCCCT  | GGCTGT | CCTGGA | ACTCAC | TCTGTA | GACCAG | GCTTCC | TCAAAC | TCAGAA |
| 3601 | ATCCAC | CTGCCT  | CTGCCT | CCCAAG | TGCTGG | GATTAA | AGGCGT | GCACCA | CCACGG | CTGGCT |
| 3661 | CTGACT | TTTTTT  | TTTTTT | AAGAGT | TACTTT | ATTTAT | ATGAGT | ACACTG | TTACTG | TTTTCA |
| 3721 | GACACC | CCAGAA  | GAGGGC | ATTGGA | TCCCAT | TACAGA | TGGTTG | TGAACC | ACCATG | TTGGTG |
| 3781 | GTGGGA | ATTGAA  | CTCAGG | ACCTCT | GGAAGA | GCAGTC | AGTGCT | CTTAAC | CATACC | ATGCAG |
| 3841 | TTAGTA | TCTGAG  | AGTAAA | GTAGCA | GAAGCT | ATACAC | CGTCTG | AGAATC | AATTCT | TGTAGT |
| 3901 | GTAGGC | TTCTGG  | AGTCCC | AGAAAC | TGCTTT | TCAAGT | TAAATT | GGGTGC | AGGGAG | GGAGGG |
| 3961 | GGAGAA | TAGGTC  | TAATTG | TTTCTG | AAACCT | TTTGGC | AGAAGG | GTAAAA | GATAAG | TCAGAT |
| 4021 | TGCCTG | TTTTTT  | GCATCT | TATGGC | TTCCAG | GTCTGC | AAAGTG | TTTTAG | AAGCTT | CCTAGA |
| 4081 | ATTTTG | TTATGG  | AAGCTT | TTGAAA | AGACTT | AGACAT | GTTTTG | TGGACC | TGGTTT | GGGGGT |
| 4141 | AGGGAA | TTTACT  | TGAAGA | GGGATT | AGGTAG | TGTTTG | CTAGCC | AGTCTT | CAATAC | AATTCA |
| 4201 | AGTTTA | AGGTCA  | TCTTAG | ATTTAT | AAATAT | TTGTGT | TGGAGA | CTTGTG | ATACTG | GTTTCT |
| 4261 | GAGATG | GGGAAC  | TAGGTT | TCCTTG | TGAAGG | TCCAGG | CCCAGT | AAGTAA | TGGTAA | TACAAG |
| 4321 | TCAATT | CAAAAC  | TCCTGA | GAACAG | CAAAAT | TGGAAC | TTGTCT | TATTAT | ATTTTT | TATTAT |
| 4381 | TGTATT | ATATAT  | AAATGA | ATGCTC | CTCTTA | CAAAGT | GTTGGA | TCATAT | TTACAA | ATTTTA |
| 4441 | GCTACA | ACAACC  | AAAAGG | TCAAAA | GAAATG | GTATTG | TTCTCA | AATGGT | TACTGC | ATCTTC |
| 4501 | AAAATG | CAATGA  | GGGATT | CCCCCG | TCCTTC | CCCCCC | CCCCGC | CCCCTC | ACGTCA | CTCCTT |
| 4561 | GCCCCC | GCAGGG  | ATAACC | TTTGTG | AGGGAC | TGTTCA | TTCACT | ATGATC | TGTTGT | TTAAGG |
| 4621 | ACAAAG | TCATGT  | GACTTT | TATAAA | GTTTTT | TTGGTT | TGATGT | GGTTGA | GTGGAT | GGGTAA |
| 4681 | TTAATG | AGTTTA  | GCTATG | GTGGTG | ACAAAA | AAACAC | GACCCA | GTTACT | CATTGA | GGATGA |
| 4741 | TTTCAA | TTTTAG  | CTGAAT | ACATTT | TGTTTT | CCCAAC | GTGTGT | GTCATT | ACTTCA | AGATCT |
| 4801 | TAATTT | TAAAGT  | TTGCTA | GAATTA | GTATTA | AGGAGC | ACCGAT | TCTGGG | AACTTA | ACAGAA |
| 4861 | GGTGT  | CTGTAA  | GGCAAG | AGGAAA | ATTTTT | TTTTTT | AACTAT | TTGGTC | TCTAAT | TGGCTT |
| 4921 | TCATGT | GCCCTA  | AAAACC | GATGTT | TGATGT | ATTTTT | TCTTAG | TGCTCT | TTGTC  | CTTGTG |
| 4981 | AGATCA | GTATAG  | CAATTA | AATGAA | AGGGTC | TGGATA | TCTAGT | GTGGAA | TAGAAA | AGAGTT |
| 5041 | ACAAAG | CATACC  | TAAAAC | TAATTT | CACTGT | GGTCGG | TAGGTA | GAGCTC | TTAGGC | TGACAT |
| 5101 | CACGAG | CTAGCG  | AAGTAG | CAAGTT | TAGCTG | CACTGG | TGATGA | CGCAAG | TCAACA | AAAGTC |
| 5161 | ACGTGG | GATAAA  | ACGGTT | GCTTCC | ATTGGA | AAGCCT | GGCTTT | AGGGAG | AGGTTA | TGGACG |
| 5221 | TTACGT | GCGGTT  | CACACT | GACGGT | ATTATA | ACAACT | TTATGC | GGATGC | TAGCGA | AGTTTG |
| 5281 | ATATTC | TAAGAA  | CTTCGC | TTAGGT | TCTGCA | ACAATG | AGTTCT | TCTTGC | GTTTAC | CATCTG |
| 5341 | CGTGGT | AATGTG  | ACCAGA | TAGCCT | CTGCCG | CTTTCT | CCTTTG | CCAGTT | TCCATG | AAATCT |
| 5401 | TACGGA | TTATCT  | CTCACT | ACTGCT | GCCCTA | GGTAAT | GAGGAA | AAGAAA | ATGGCG | GCGGAA |
| 5461 | AAGGCT | AGAGGC  | GAGGGC | GAAGAG | GGGTCC | TTCAGT | CTCACA | GTCGAA | GAGAAG | AAGGCG |
| 5521 | CTTTGT | GGATTA  | GATAGG | TACGCA | CTGCTA | ATACTT | ACAGGT | TGTCTT | TCTCTC | TCCGGG |
| 5581 | TTCAAA | AGACTC  | TCCAGG | AGGCCT | GACTGC | ATCTTG | CTTGCG | GTGACG | ACTCGC | TTTCGC |
| 5641 | CTAGCA | CTGTTA  | ACAATG | TTTTGG | GAGATT | TTTTAC | TGATGT | CTTTCT | GTGATC | ATTAAC |
| 5701 | AAGAGC | CATGTA  | TTTCTT | CCACAG | CAGCTT | CTTCGG | GTTCTT | GACCCG | ATGCAA | AGATGG |
| 5761 | CGCCAA | GATGAA  | GACGCT | GTTGAA | CAAGGT | CAGCAA | CTGTTT | AAACAT | AATTAC | TTATAT |
| 5821 | TTTTCT | CCTAAG  | CTTTTC | ACTGTT | CCAAGC | CTGGAG | CCTCTC | CCTACT | CTGAAA | GTGCTC |
| 5881 | ATTATA | GCTTTT  | AGGGAT | CTTTGA | AACTTT | TTTTTT | CCTTCC | CCGTTT | CTCCTT | TCTTTG |
| 5941 | CTTACT | TTCTGT  | ATAGTT | TGAGGC | CCTGCC | TCAGCA | TACAGC | CCAGAG | CACGAG | CTTATT |
| 6001 | TGCAGT | TTTTCT  | GAGGTC | AGCTAT | ATCCTC | CAGTTA | CTCATC | TCAAGT | TATGAG | AAGACG |
| 6061 | CTTGGT | TGTTGC  | AGCCTC | TTGTGA | TATACA | CACGTT | TTATTA | TTTTCC | CATAAG | GACAAA |
| 6121 | GTTATA | GGTAAG  | GAGATA | AAGAGT | TTCCGT | ACTTAA | AAAGAA | TTTTTT | ACGATG | CAGTAG |
| 6181 | TAATAC | TATGCA  | GAAATA | ATACTG | AATTCC | AGTTTG | GAATGT | TAATTT | TTTTTT | TTTTTT |
| 6241 | ACTTCC | TTGTAG  | TTTATT | TTCCAG | AGAGTG | AGAGAG | CACACG | GCATTT | CCTTTG | TGAAAC |
| 6301 | TTTGCA | TTGTCA  | TTTAGT | TATTGG | CTGCTG | GTATCA | ATCAAG | ATGGTG | GCTTAA | GACTGA |
| 6361 | CGGGCA | CCGGAG  | CCAATT | CCCCTT | CCTTTC | AAGACC | TGGTAC | CAAAAA | AGCACC | GACTCG |
| 6421 | GTGCCA | CTTTTT  | CAAGTT | GATAAC | GGACTA | GCCTTA | TTTTAA | CTTGCT | ATTTCT | AGCTCT |
| 6481 | AAAACT | TTTGAG  | GCTCAT | CTCTGC | AGGTGT | TTTCGT | CCTTCC | ACAAGA | TATATA | AAGCCA |
| 6541 | AGAAAT | CGAAAT  | ACTTTC | AAGTTA | CGGTAA | GCATAT | GATAGT | CCATTT | TAAAAC | ATAATT |
| 6601 | TTAAAA | CTGCAA  | ACTACC | CAAGAA | ATTATT | ACTTTC | TACGTC | ACGTAT | TTTGTA | CTAATA |
| 6661 | TCTTTG | TGTTTTA | CAGTCA | AATTAA | TTCCAA | TTATCT | CTCTAA | CAGCCT | TGTATC | GTATAT |
| 6721 | GCAAAT | ATGAAG  | GAATCA | TGGGAA | ATAGGC | CCTCTT | CTAGAA | AAAAAG | CACCGA | CTCGGT |
| 6781 | GCCACT | TTTTCA  | AGTTGA | TAACGG | ACTAGC | CTTATT | TTAACT | TGCTAT | TTCTAG | CTCTAA |
| 6841 | AACATC | TACAAG  | ATTACG | GTCTGG | GTGTTT | CGTCCT | TTCCAC | AAGATA | TATAAA | GCCAAG |
| 6901 | AAATCG | AAATAC  | TTTCAA | GTTACG | GTAAGC | ATATGA | TAGTCC | ATTTTA | AAACAT | AATTTT |
| 6961 | AAAACT | GCAAAC  | TACCCA | AGAAAT | TATTAC | TTTCTA | CGTCAC | GTATTT | TGTACT | AATATC |
| 7021 | TTTGTG | TTTACA  | GTCAAA | TTAATT | CCAATT | ATCTCT | CTAACA | GCCTTG | TATCGT | ATATGC |

|       |        |        |        |        |        |         |        |        |        |        |
|-------|--------|--------|--------|--------|--------|---------|--------|--------|--------|--------|
| 7081  | AAATAT | GAAGGA | ATCATG | GGAAAT | AGGCC  | TCGGAT  | CCAAAA | AAGCAC | CGACTC | GGTGCC |
| 7141  | ACTTTT | TCAAGT | TGATAA | CGGACT | AGCCTT | ATTTTA  | ACTTGC | TATTTT | TAGCTC | TAAAC  |
| 7201  | CGATTC | GCCCGG | TGGCAG | TGGGTG | TTTCGT | CCTTTC  | CACAAG | ATATAT | AAAGCC | AAGAAA |
| 7261  | TCGAAA | TACTTT | CAAGTT | ACGGTA | AGCATA | TGATAG  | TCCATT | TTAAAA | CATAAT | TTTAAA |
| 7321  | ACTGCA | AACTAC | CCAAGA | AATTAT | TACTTT | CTACGT  | CACGTA | TTTTGT | ACTAAT | ATCTTT |
| 7381  | GTGTTT | ACAGTC | AAATTA | ATTCCA | ATTATC | TCTCTA  | ACAGCC | TTGTAT | CGTATA | TGCAAA |
| 7441  | TATGAA | GGAATC | ATGGGA | AATAGG | CCCTCA | CGCGTG  | CGGCCG | CCTCGA | GGGACC | TAATAA |
| 7501  | CTTCGT | ATAGCA | TACATT | ATACGA | AGTTAT | ATTAAG  | GGTTCC | GCAAGC | TCTAGT | CGAGCC |
| 7561  | CCAGTC | GGTTCT | TTCCGC | CTCAGA | AGCCAT | AGAGCC  | CACCGC | ATCCCC | AGCATG | CCTGCT |
| 7621  | ATTGTC | TTCCCA | ATCCTC | CCCCTT | GCTGTC | CTGCCC  | CACCCC | ACCCCC | CAGAAT | AGAATG |
| 7681  | ACACCT | ACTCAG | ACAATG | CGATGC | AATTTT | CTCATT  | TTATTA | GGAAA  | GACAGT | GGGAGT |
| 7741  | GGCACC | TTCCAG | GGTCAA | GGAAGG | CACGGG | GGAGGG  | GCAAAC | AACAGA | TGGCTG | GCAACT |
| 7801  | AGAAGG | CACAGT | CGAGGC | TGATCA | GCGAGC | TCTAGA  | GAATTG | ATCCCC | TCAGAA | GAAGTC |
| 7861  | GTCAAG | AAGGCG | ATAGAA | GGCGAT | GCGCTG | CGAATC  | GGGAGC | GGCGAT | ACCGTA | AAGCAC |
| 7921  | GAGGAA | GCGGTC | AGCCCA | TTTCGC | GCCAAG | CTCTTC  | AGCAAT | ATCACG | GGTAGC | CAACGC |
| 7981  | TATGTC | CTGATA | GCGGTC | CGCCAC | ACCCAG | CCGGCC  | ACAGTC | GATGAA | TCCAGA | AAAGCG |
| 8041  | GCCATT | TTCCAC | CATGAT | ATTCGG | CAAGCA | GGCATC  | GCCATG | GGTCAC | GACGAG | ATCATC |
| 8101  | GCCGTC | GGGCAT | GCGCGC | CTTGAG | CCTGGC | GAACAG  | TTCGGC | TGGCGC | GAGCCC | CTGATG |
| 8161  | CTCTTC | GTCCAG | ATCATC | CTGATC | GACAAG | ACCGGC  | TTCCAT | CCGAGT | ACGTGC | TCGCTC |
| 8221  | GATGCG | ATGTTT | CGCTTG | GTGGTC | GAATGG | GCAGGT  | AGCCGG | ATCAAG | CGTATG | CAGCCG |
| 8281  | CCGCAT | TGCATC | AGCCAT | GATGGA | TACTTT | CTCGGC  | AGGAGC | AAGGTG | AGATGA | CAGGAG |
| 8341  | ATCCTG | CCCCGG | CACTTC | GCCCAA | TAGCAG | CCAGTC  | CCTTCC | CGCTTC | AGTGAC | AACGTC |
| 8401  | GAGCAC | AGCTGC | GCAAGG | AACGCC | CGTCGT | GGCCAG  | CCACGA | TAGCCG | CGCTGC | CTCGTC |
| 8461  | CTGCAG | TTCATT | CAGGGC | ACCGGA | CAGGTC | GGTCTT  | GACAAA | AAGAAC | CGGGCG | CCCCTG |
| 8521  | CGCTGA | CAGCCG | GAACAC | GGCGGC | ATCAGA | GCAGCC  | GATTGT | CTGTTG | TGCCCA | GTCATA |
| 8581  | GCCGAA | TAGCCT | CTCCAC | CCAAGC | GGCCGG | AGAACC  | TGCGTG | CAATCC | ATCTTG | TTCAAT |
| 8641  | GGCCGA | TCCCAT | GGTTTA | GTTCTT | CACCTT | GTCGTA  | TTATAC | TATGCC | GATATA | CTATGC |
| 8701  | CGATGA | TTAATT | GTCAAC | AGGCTG | CAGGTC | GAAAGG  | CCCGGA | GATGAG | GAAAGG | GAGAAC |
| 8761  | AGCGCG | GCAGAC | GTGCGC | TTTTGA | AGCGTG | CAGAAT  | GCCGGG | CCTCCG | GAGGAC | CTTCGG |
| 8821  | GCGCCC | GCCCCG | CCCCTG | AGCCCC | CCCCTG | AGCCCC  | CCCCCG | GACCCA | CCCCTT | CCCAGC |
| 8881  | CTCTGA | GCCAG  | AAAGCG | AAGGAG | CAAAGC | TGCTAT  | TGGCCG | CTGCCC | CAAAGG | CCTACC |
| 8941  | CGCTTC | CATTGC | TCAGCG | GTGCTG | TCCATC | TGCACG  | AGACTA | GTGAGA | CGTGCT | ACTTCC |
| 9001  | ATTTGT | CACGTC | CTGCAC | GACGCG | AGCTGC | GGGGCG  | GGGGGG | AACTTC | CTGACT | AGGGGA |
| 9061  | GGAGTA | GAAGGT | GGCGCG | AAGGGG | CCACCA | AAGAAC  | GGAGCC | GGTTGG | CGCTA  | CCGGTG |
| 9121  | GATGTG | GAATGT | GTGCGA | GGCCAG | AGGCCA | CTTGTTG | TAGCGC | CAAGTG | CCCAGC | GGGGCT |
| 9181  | GCTAAA | GCGCAT | GCTCCA | GACTGC | CTTGGG | AAAAGC  | GCCTCC | CCTACC | CGGTAG | AATTTT |
| 9241  | GACGAC | CTGCAG | CCAAGC | TAGCTT | CGCGAG | CTCGAC  | CGAACA | AACGAC | CCAACA | CCCGTG |
| 9301  | CGTTTT | ATTCTG | TCTTTT | TATTTG | CGCTCA | GCTTTA  | CAGTGA | CAATGA | CGGCTG | GCGACT |
| 9361  | GAATAT | TAGTGC | TTACAG | ACAGCA | CTACAT | ATTTTC  | CGTCGA | TGTTGA | AATCCT | TTCTCA |
| 9421  | TATGTC | ACCATA | AATATC | AAATAA | TTATAG | CAATCA  | TTTACG | CGTTAA | TGGCTA | ATCGCC |
| 9481  | ATCTTC | CAGCAG | GCGCAC | CATTGC | CCCTGT | TTCATC  | ATCCAG | GTTACG | GATATA | GTTTAT |
| 9541  | GACAA  | ATTTAC | ATTGGT | CCAGCC | ACCAGC | TTGCAT  | GATCTC | CGGTAT | TGAAAC | TCCAGC |
| 9601  | GCGGGC | CATATC | TCGCGC | GGCTCC | GACACG | GGCATC  | GTGTCC | AGACCA | GGCCAG | GTATCT |
| 9661  | CTGACC | AGAGTC | ATCCTT | AGCGCC | GTAATC | CAATCG  | ATGAGT | TGCTTC | AAAAAT | CCCTTC |
| 9721  | CAGGGC | GCGAGT | TGATAG | CTGGCT | GGTGGC | AGATGG  | CGCGGC | AACACC | ATTTTT | TCTGAC |
| 9781  | CCGGCA | AAACAG | GATGTT | ATTCGG | ATCATC | AGCTAC  | ACCAGA | GACGGA | AATCCA | TCGCTC |
| 9841  | GACCAG | TTTAGT | TACCCC | CAGGCT | AAGTGC | CTTCTC  | TACACC | TGCGGT | GCTAAC | CAGCGT |
| 9901  | TTTCGT | TCTGCC | AATATG | GATTAA | CATTCT | CCCACC  | GTCAGT | ACGTGA | GATATC | TTTAA  |
| 9961  | CCTGAT | CCTGGC | AATTTT | GGCTAT | ACGTAA | CAGGGT  | GTTATA | AGCAAT | CCCCAG | AAATGC |
| 10021 | CAGATT | ACGTAT | ATCCTG | GCAGCG | ATCGCT | ATTTTC  | CATGAG | TGAACG | AACCTG | GTCGAA |
| 10081 | ATCAGT | GCGTTC | GAACGC | TAGAGC | CTGTTT | TGCACG  | TTCACC | GGCATC | AACGTT | TTCTTT |
| 10141 | TCGGAT | CCGCCG | CATAAC | CAGTGA | AACAGC | ATTGCT  | GTCACT | TGGTCG | TGGCAG | CCCGGA |
| 10201 | CCGACG | ATGAAG | CATGTT | TAGCTG | GCCCAA | ATGTTG  | CTGGAT | AGTTTT | TACTGC | CAGACC |
| 10261 | GCGCGC | CTGAAG | ATATAG | AAGATA | ATCGCG | AACATC  | TTCAGG | TTCTGC | GGGAAA | CCATTT |
| 10321 | CCGGTT | ATTTAA | CTTGCA | CCATGC | CGCCCA | CGACCG  | GCAAAC | GGACAG | AAGCAT | TTTCCA |
| 10381 | GGTATG | CTCAGA | AAACGC | CTGGCG | ATCCCT | GAACAT  | GTCCAT | CAGGTT | CTTGCG | AACCTC |
| 10441 | ATCACT | CGTTGC | ATCGAC | CGGTAA | TGCAGG | CAAATT  | TTGGTG | TACGGT | CAGTAA | ATTGGA |
| 10501 | CACCTT | CCTCTT | CTTCTT | GGGCAT | GGCCGC | AGGAAA  | GCAGAG | CCCTGA | AGCTCC | CATCAC |
| 10561 | CGGCCA | ATAAGA | GCCAAG | CCTGCA | GTGTGA | CCTCAT  | AGAGCA | ATGTGC | CAGCCA | GCCTGA |
| 10621 | CCCCAA | GGGCCC | TCAGGC | TTGGGC | ACACTG | TCTCTA  | GGACCC | TGAGAG | AAAGAC | ATACCC |
| 10681 | ATTTCT | GCTTAG | GGCCCT | GAGGAT | GAGCCC | AGGGGT  | GGCTTG | GCACCT | AAGCAA | AGGACA |



|       |        |        |        |        |        |        |        |        |        |         |
|-------|--------|--------|--------|--------|--------|--------|--------|--------|--------|---------|
| 10741 | CTGGGG | CTCAGC | TGGCAG | CAAAGT | GACCAG | GATGCT | GAGGCT | TTGACC | CAGAAG | CCAGAG  |
| 10801 | GCCAGA | GGCCAG | GACTTC | TCTTGG | TCCCAG | TCCACC | CTCACT | CAGAGC | TTTACC | AATGCC  |
| 10861 | CTCTGG | ATAGTT | GTCGGG | TAACGG | TGGACG | CCACTG | ATTCTC | TGGCCA | GCCTAG | GACTTC  |
| 10921 | GCCATT | CCGCTG | ATTCTG | CTCTTC | CAGCCA | CTGGCT | GACCGG | TTGGAA | GTACTC | CAGCAG  |
| 10981 | TGCCTT | GGCATC | CAGGGC | ATCTGA | GCCTAC | CAGGTC | CTTCAG | TACCTC | CTGCCA | GGGCTT  |
| 11041 | GGAGCA | GCCAGC | CTGCAA | CACCTG | CCTGCC | AAGCAG | AGTGAC | CACTGT | GGGCAC | AGGGGA  |
| 11101 | CACAGG | GTGGGG | CCCACA | ACAGCA | CCATTG | TCCACT | TGTCCC | TCACTA | GTAATA | GAACTC  |
| 11161 | TAGGGT | TGCGGG | GGGTGG | GGGAGG | TCTCTG | TGAGGC | TGGTAA | GGGATA | TTTGCC | TGGCCC  |
| 11221 | ATGGAG | CTAGCT | TGGCTG | GACGTA | AACTCC | TCTTCA | GACCTA | ATAACT | TGTTAT | AGCATA  |
| 11281 | CATTAT | ACGAAG | TTATAT | TAAGGG | TTATTG | AATATG | ATCGGA | ATTGGG | CTGCAG | GAATTC  |
| 11341 | GATAGC | TTGGCT | GCAGGT | CGACGT | ACGTAG | CAAGCT | TGATGG | GCCCTG | GTACCG | AAATAG  |
| 11401 | AGGGAG | GAGAGG | GGAAAT | GAAACA | GTTTTA | GAAAGG | AAACAG | GGTAGT | TTTACC | AAGAAA  |
| 11461 | ATATTA | AACCTA | GCAAGT | ACAGGT | TAATGA | AAAGTA | TTCCCC | ATTACT | TAAAAG | GAGAAAT |
| 11521 | TATCAA | GTCTTT | TTAAAC | CTTTAA | AAAAAG | ATTCTT | AGCCGG | GCGGGG | TGGCAC | ATGCCT  |
| 11581 | TTAATC | CCAGCA | CTTGGG | AGGCAG | AGGCAG | GCAGAT | TTCTGA | GTTTGA | GGCCAG | TCTGGT  |
| 11641 | CTACAG | AGTGAG | TTCCAG | GACAGC | CAGGGC | TACACA | GAGATA | CCCTGT | CTCAAA | AAAAAA  |
| 11701 | AAAAAA | ATTCTT | AAAGGT | AACATA | TTTAGA | TACTTG | TAAACC | ATAGCA | AAAAAA | GCACAG  |
| 11761 | ATCTGT | GACATA | CATACT | TGTTAC | CATTAT | ATAGTT | TCCGTT | CTAATG | AAAATC | AGTGAT  |
| 11821 | TATAAA | CTTGAT | AATTTT | ATACCA | CCAATG | AAGTAT | TAATAG | TATTCT | TTTTTT | GTTTTT  |
| 11881 | GGAGAC | AGGGTT | TCTCAG | TATAGC | TCTGGT | TGCTAT | ACAGTT | AATAGT | GTTCTT | AACATA  |
| 11941 | TATGTG | TATATA | TAAATT | TATGTA | TGTATG | TATATA | TATATA | TACATA | TATATA | TATGCA  |
| 12001 | TATTAT | GCACAC | ATAATT | TTTGGT | TTGGTT | TGGTTG | TGAGCC | TAGCCT | TTAAGG | ACTGAG  |
| 12061 | TCCAAG | ATTTAA | ACACTC | TTCAGG | TGATAT | GTATAG | AAACAT | ATTTCT | GTTTAC | TAGTAG  |
| 12121 | GTTGCT | AGGTTT | CTGGTG | TACAGT | GGGTAA | TTTTAA | ATTTGA | TGTTAA | CCTCCA | CACTCT  |
| 12181 | TTTAAG | ATTTCA | TGGTAA | AAGCTT | AAAGAA | ATGATT | TTGTCT | AGTTTT | TATTTT | TATTTT  |
| 12241 | TTAATT | TTTTTT | ATTTTT | TTGGTT | TTTGGG | GACAGG | GTTTCT | CTGTAT | AGCTAT | GGCTGT  |
| 12301 | CCTGGA | ACTCAC | TTTGTA | GACCAG | CTGGGC | CTCAAA | CTCAGA | AATCTG | CTGTCT | TCTCCC  |
| 12361 | TCCTGA | GTGCTG | GGATTA | AAGGCA | TGCACC | ACCACG | CCTGAC | GTGGTT | TTTTAA | GATATA  |
| 12421 | ATTATT | TAACTA | TATCTT | AGCATT | TCTTTT | TTTTTT | TTAGAG | TAGTAA | TTCTTA | TATTAT  |
| 12481 | AAAAAA | GACTTG | GTGTTG | AATGTA | TTTTTT | GAGTGA | CTACAA | CAACTA | TGTGTG | ATCCTG  |
| 12541 | TTTGTC | CTAGAA | CTCACA | GACAGA | AATATC | ACTTTC | TCTGCT | TTCTCA | TTGCTC | ATTGCT  |
| 12601 | AAGATT | AAAGCC | CTGTTT | TCCTAA | AACTGG | CTTCTT | TTAAAT | TTAATA | ATTTTG | TATATA  |
| 12661 | TTCATG | TCTGGA | AGTTAT | AGGACA | AATTGT | GGAAGT | CAGTTT | TCTTCT | TCTATC | ATGTCA  |
| 12721 | GGGCTG | GAGGCA | AGTCCT | TTTACT | AGCTAA | GCCACT | TCCTTG | AACTTT | CAGTTT | ATGTGT  |
| 12781 | ATAGTG | TTTCTA | CTGCTT | GTAGGT | CTATTC | CACTTG | AGTGTC | TGGTTC | TACTAA | GGAGTT  |
| 12841 | TAGAAG | AGACAG | ACCTAT | GGAACT | GGAATT | AGTGAA | GGTTGT | GAGCTT | CACTAA | TCAAAC  |
| 12901 | CAGTGT | TCTCTT | GCAGAG | CTCTTT | AGTTTA | TTTAAG | TAGCAT | ATATTT | TTCAGG | TGCTTT  |
| 12961 | GTAATA | TCAATT | TATATG | TTAGTA | AACTGT | TTTCAA | ATATTG | AAATAA | CAGGTA | TTTTTT  |
| 13021 | AACTAA | TTGCAA | CAGCAT | TTTAAA | AATGAG | AAGTTA | AAAACA | AAATAT | GAGAAA | CTATCA  |
| 13081 | AGTGCC | ACTGTT | CTTAGA | ACATTT | ATGAGT | TGTGCC | TTTATT | AAACAT | TGAGTA | ATATGT  |
| 13141 | ATTTTT | GTTTTA | GATCAG | TCTCAG | CCTTTC | TAATGC | AGTTTC | TCATGT | TGTGAT | GACCCC  |
| 13201 | CAACCA | TAAAAT | TATTTT | TGTTGT | TATTCA | TAACTA | ATTTTG | GTGCTG | TTATGA | ATCATT  |
| 13261 | ATGTAA | ATATCT | GAATAG | TTTATT | AGTGAC | CAAAAA | GGTATT | TTGACC | CATAGG | TTGAGA  |
| 13321 | ACCATT | ATTTTA | GACACT | GTCTTA | GTCTAT | ATTTTG | TTGCC  | AGAATA | GCTTFA | AATTTG  |
| 13381 | AAGAAG | TACTCA | TCTCTC | AGCCTC | CAAGTA | TTGAGA | TTTCAG | GCATGA | GCCACT | ACTCTT  |
| 13441 | TAACAG | TTATTA | AAATGT | ATTACA | ATTATA | ATTTAA | AATGAC | AAGTAT | TAAAAA | CTGAAA  |
| 13501 | TATAGG | GCTGGT | GAGATG | GCTCAG | TGGGTA | AGAGCA | CCCGAC | TGCTCT | TCCGAA | GGTCCA  |
| 13561 | GAGTTC | AAATCC | CAGCAA | CCACAT | GGTGGC | TCACAA | CCATCC | ATAACG | AGATCT | GACTCC  |
| 13621 | CTCTTC | TGGAGT | GTCTGA | AGACAG | CTACAG | TGTACT | TACATA | TAATAA | ATAAAT | CTTTAA  |
| 13681 | AAAAAA | AAAAAC | AAAAAA | AAACCT | GAAATA | TATAAA | GGGCAA | TTGATG | GATGGT | GGTGGG  |
| 13741 | ATATCC | CTTTAT | CCTAGC | ACTGTG | CAGAGG | CAGTTG | GGTCTC | TTATAA | GTTTGA | GGCCAG  |
| 13801 | CCTGAT | CTACAT | AGCAAG | TTTCAG | GACAGC | AAGATT | AGACAG | AGAAAC | CTGCCT | CAAAAA  |
| 13861 | AGGACA | ATTTGT | TTTTTA | GCCTGA | CAGTGG | TGGCAT | ACACCT | TTAAAC | CCAGCA | CTTGGG  |
| 13921 | GGACAT | AGGCAG | ATAGAT | CTTTGG | CGGCCG | CGTACC | AGCTTT | TGTTCC | CTTTAG | TGAGGG  |
| 13981 | TTAATT | TCGAGC | TTGGCG | TAATCA | TGGTCA | TAGCTG | TTTCCT | GTGTGA | AATTGT | TATCCG  |
| 14041 | CTCACA | ATTCCA | CACAAC | ATACGA | GCCGGA | AGCATA | AAGTGT | AAAGCC | TGGGGT | GCCTAA  |
| 14101 | TGAGTG | AGCTAA | CTCACA | TTAATT | GCGTTG | CGCTCA | CTGCCC | GCTTTC | CAGTCG | GGAAAC  |
| 14161 | CTGTCT | TGCCAG | CTGCAT | TAATGA | ATCGGC | CAACGC | GCGGGG | AGAGGC | GGTTTG | CGTATT  |
| 14221 | GGGCGC | TCTTCC | GCTTCC | TCGCTC | ACTGAC | TCGCTG | CGCTCG | GTCGTT | CGGCTG | CGGCGA  |
| 14281 | GCGGTA | TCAGCT | CACTCA | AAGGCG | GTAATA | CGGTTA | TCCACA | GAATCA | GGGGAT | AACGCA  |
| 14341 | GGAAG  | AACATG | TGAGCA | AAAGGC | CAGCAA | AAGGCC | AGGAAC | CGTAAA | AAGGCC | GCGTTG  |

14401 CTGGCG TTTTTC CATAGG CTCCGC CCCCCT GACGAG CATCAC AAAAAT CGACGC TCAAGT  
14461 CAGAGG TGGCGA AACCCG ACAGGA CTATAA AGATAC CAGGCG TTTCCC CCTGGA AGCTCC  
14521 CTCGTG CGCTCT CCTGTT CCGACC CTGCCG CTTACC GGATAC CTGTCC GCCTTT CTCCCT  
14581 TCGGGA AGCGTG GCGCTT TCTCAT AGCTCA CGCTGT AGGTAT CTCAGT TCGGTG TAGGTC  
14641 GTTCGC TCCAAG CTGGGC TGTGTG CACGAA CCCCCC GTTCAG CCCGAC CGCTGC GCCTTA  
14701 TCCGGT AACTAT CGTCTT GAGTCC AACCCG GTAAGA CACGAC TTATCG CCACTG GCAGCA  
14761 GCCACT GGTAAC AGGATT AGCAGA GCGAGG TATGTA GGCGGT GCTACA GAGTTC TTGAAG  
14821 TGGTGG CCTAAC TACGGC TACACT AGAAGA ACAGTA TTTGGT ATCTGC GCTCTG CTGAAG  
14881 CCAGTT ACCTTC GGAAAA AGAGTT GGTAGC TCTTGA TCCGGC AAACAA ACCACC GCTGGT  
14941 AGCGGT GTTTTT TTTGTT TGCAAG CAGCAG ATTACG CGCAGA AAAAAA GGATCT CAAGAA  
15001 GATCCT TTGATC TTTTCT ACGGGG TCTGAC GCTCAG TGGAAC GAAAAC TCACGT TAAGGG  
15061 ATTTTG GTCATG AGATTA TCAAAA AGGATC TTCACC TAGATC CTTTTA AATTAA AAATGA  
15121 AGTTTT AAATCA ATCTAA AGTATA TATGAG TAAACT TGGTCT GACAGT TACCAA TGCTTA  
15181 ATCAGT GAGGCA CCTATC TCAGCG ATCTGT CTATTT CGTTCA TCCATA GTTGCC TGACTC  
15241 CCCGTC GTGTAG ATAACT ACGATA CGGGAG GGCTTA CCATCT GGCCCC AGTGCT GCAATG  
15301 ATACCG CGAGAC CCACGC TCACCG GCTCCA GATTTA TCAGCA ATAAAC CAGCCA GCCGGA  
15361 AGGGCC GAGCGC AGAAGT GGTCCCT GCAACT TTATCC GCCTCC ATCCAG TCTATT AATTGT  
15421 TGCCGG GAAGCT AGAGTA AGTAGT TCGCCA GTTAAT AGTTTG CGCAAC GTTGTT GCCATT  
15481 GCTACA GGCATC GTGGTG TCACGC TCGTCG TTTGGT ATGGCT TCATTC AGCTCC GGTTC  
15541 CAACGA TCAAGG CGAGTT ACATGA TCCCCC ATGTTG TGCAAA AAAGCG GTTAGC TCCTTC  
15601 GGTCCCT CCGATC GTTGTC AGAAGT AAGTTG GCCGCA GTGTTA TCACTC ATGGTT ATGGCA  
15661 GCACTG CATAAT TCTCTT ACTGTC ATGCCA TCCGTA AGATGC TTTTCT GTGACT GGTGAG  
15721 TACTCA ACCAAG TCATTC TGAGAA TAGTGT ATGCGG CGACCG AGTTGC TCTTGC CCGGCG  
15781 TCAATA CGGGAT AATACC GCGCCA CATAGC AGAACT TTAAAA GTGCTC ATCATT GGAAAA  
15841 CGTTCT TCGGGG CGAAAA CTCTCA AGGATC TTACCG CTGTTG AGATCC AGTTCG ATGTAA  
15901 CCCACT CGTGCA CCCAAC TGATCT TCAGCA TCTTTT ACTTTC ACCAGC GTTCTT GGTGTA  
15961 GCAAAA ACAGGA AGGCAA AATGCC GCAAAA AAGGGA ATAAGG GCGACA CGGAAA TGTGTA  
16021 ATACTC ATACTC TTCCTT TTTCAA TATTAT TGAAGC ATTTAT CAGGGT TATTGT CTCATG  
16081 AGCGGA TACATA TTTGAA TGTATT TAGAAA AATAAAA CAAATA GGGGTT CCGCGC ACATTT  
16141 CCCCCG AAAGTG CCACCT GACGCG CCCTGT AGCGGC GCATTA AGCGCG GCGGGT GTGGTG  
16201 GTTACG CGCAGC GTGACC GCTACA CTTGCC AGCGCC CTAGCG CCCGCT CCTTTC GCTTTC  
16261 TTCCCT TCCTTT CTCGCC ACGTTC GCCGGC TTTCCC CGTCAA GCTCTA AATCGG GGGCTC  
16321 CCTTTA GGGTTC CGATTT AGTGCT TTACGG CACCTC GACCCC AAAAAA CTTGAT TAGGGT  
16381 GATGGT TCACGT AGTGGG CCATCG CCCTGA TAGACG GTTTTT CGCCCT TTGACG TTGGAG  
16441 TCCACG TTCTTT AATAGT GGACTC TTGTTC CAAACT GGAACA ACACCT AACCTT ATCTCG  
16501 GTCTAT TCTTTT GATTTA TAAGGG ATTTTG CCGATT TCGGCC TATTGG TTAAAA AATGAG  
16561 CTGATT TAACAA AAATTT AACGCG AATTTT AACAAA ATATTA A

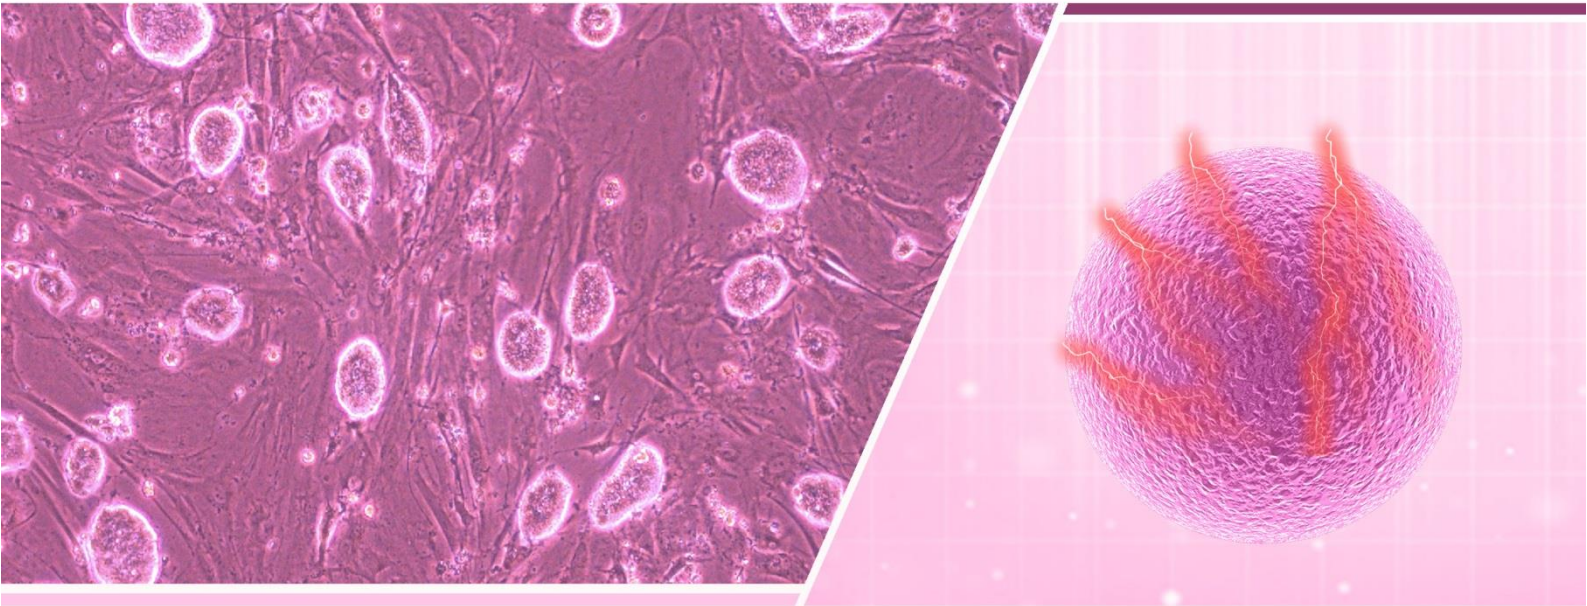

# ES Cell Report

Project: Mouse Uty Constitutive Knockin

## 1. Summary

The Uty targeting construct was linearized by restriction digestion with *Ascl*, followed by phenol/chloroform extraction and ethanol precipitation. The linearized vector was transfected into C57BL/6 ES cells according to cyagen's standard electroporation procedures. The transfected ES cells were subject to G418 selection (200 µg/mL) 24 hours post electroporation. 188 G418 resistant clones were picked and amplified in 96-well plates. Two copies of 96-well plates were made, one copy was frozen down and stored at -80°C and the other copy of the 96-well plates was used for DNA isolation and subsequent PCR screening for homologous recombination. The PCR screening identified 4 potential targeted clones, from among which 4 were expanded and further characterized by Southern blot analysis. All of the four expanded clones were confirmed to be correctly targeted.

### 1.1. PCR Screening

Regions in the following diagram were selected for PCR screening.

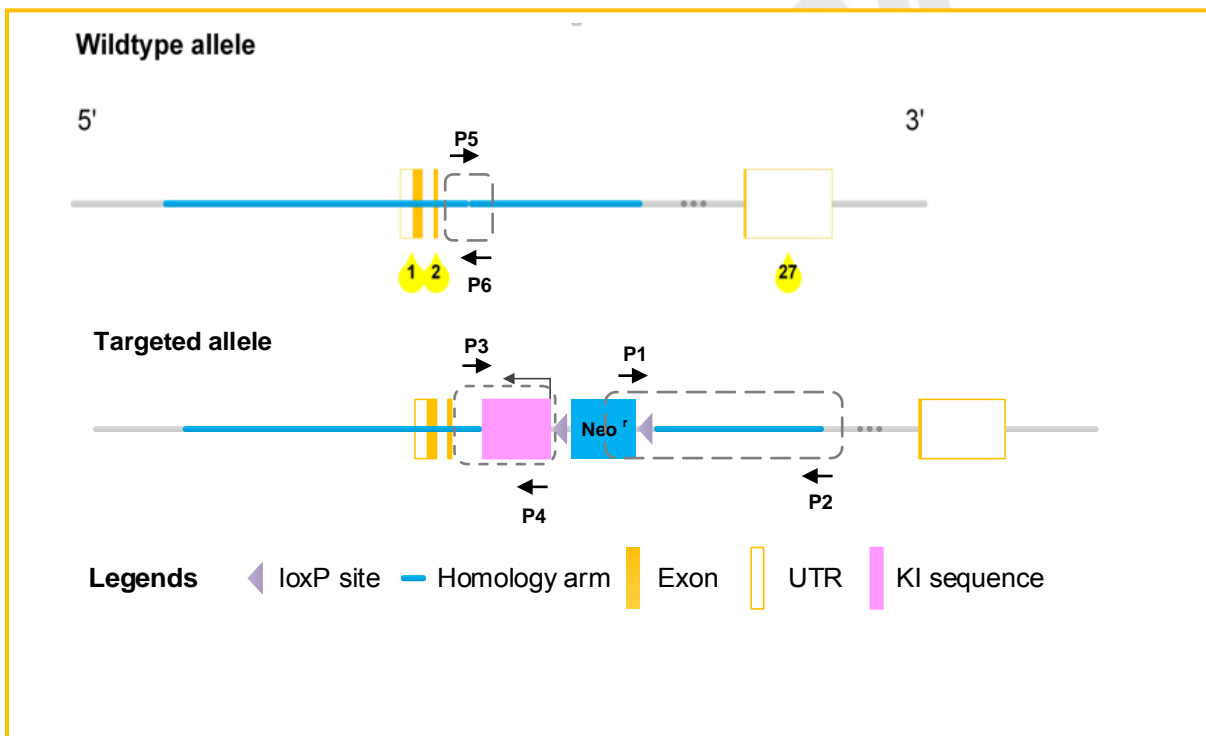

### 1.1.1. 3'arm PCR

#### Primers for 3'arm PCR:

Neo-F (P1): 5'-CAGCACCATTTGCCACTTGTCC-3'

3'arm-R (P2): 5'-CACAGGTCTGACTCAAAAAACGAC-3'

#### Expected PCR Product:

Wildtype: N.A.

Targeted: ~3.0 kb

#### Reaction Mix:

| Component                  | x1           |
|----------------------------|--------------|
| ES cell genomic DNA        | 2.0 $\mu$ l  |
| Forward primer(10 $\mu$ M) | 0.8 $\mu$ l  |
| Reverse primer(10 $\mu$ M) | 0.8 $\mu$ l  |
| dNTPs(2.5 mM)              | 2.4 $\mu$ l  |
| 5X LongAmp Taq Reaction    | 4.0 $\mu$ l  |
| LongAmp Taq DNA Polymerase | 1.2 $\mu$ l  |
| ddH <sub>2</sub> O         | 8.8 $\mu$ l  |
| Total                      | 20.0 $\mu$ l |

#### Cycling Condition:

| Step                 | Temp. | Time   | Cycles |
|----------------------|-------|--------|--------|
| Initial denaturation | 94 °C | 3 min  | 33 x   |
| Denaturation         | 94 °C | 30s    |        |
| Annealing            | 60 °C | 30s    |        |
| Extension            | 65 °C | 50s/kb |        |
| Additional extension | 65 °C | 10min  |        |

#### PCR Result:

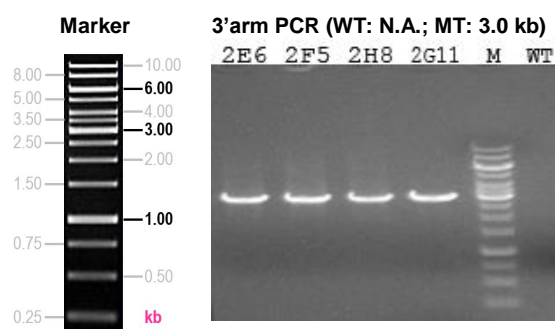

### 1.1.2. KI PCR

The potentially targeted clones were further screened by PCR for the presence of the KI site.

#### Primers for KI PCR:

KI-F (P3): 5'-CTCAAGTTATGAGAAGACGCTTGG-3'

KI-R (P4): 5'-TCGACTAGAGCTTGCGGAACCCT-3'

#### Expected PCR Product:

Wildtype: N.A.

Targeted: ~1.5 kb

#### Reaction Mix:

| Component                  | x1           |
|----------------------------|--------------|
| ES cell genomic DNA        | 2.0 $\mu$ l  |
| Forward primer(10 $\mu$ M) | 0.8 $\mu$ l  |
| Reverse primer(10 $\mu$ M) | 0.8 $\mu$ l  |
| dNTPs(2.5 mM)              | 2.4 $\mu$ l  |
| 5X LongAmp Taq Reaction    | 4.0 $\mu$ l  |
| LongAmp Taq DNA Polymerase | 1.2 $\mu$ l  |
| ddH <sub>2</sub> O         | 8.8 $\mu$ l  |
| Total                      | 20.0 $\mu$ l |

#### Cycling Condition:

| Step                 | Temp. | Time   | Cycles |
|----------------------|-------|--------|--------|
| Initial denaturation | 94 °C | 3 min  | 33 x   |
| Denaturation         | 94 °C | 30s    |        |
| Annealing            | 60 °C | 30s    |        |
| Extension            | 65 °C | 50s/kb |        |
| Additional extension | 65 °C | 10min  |        |

#### PCR Result:

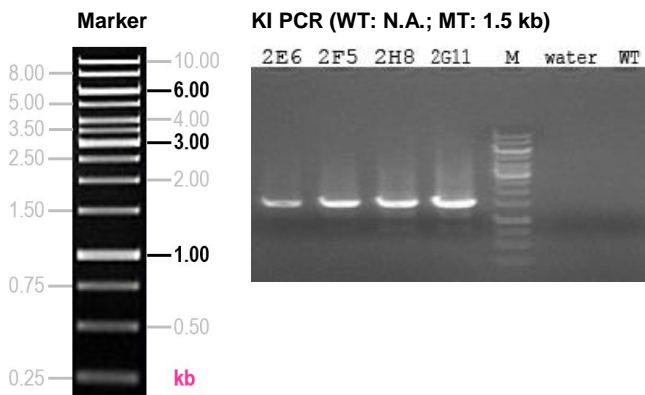

### 1.1.3. WT PCR

The potentially targeted clones were further screened by PCR for the presence of the WT site.

#### Primers for WT PCR:

WT-F (P5): 5'-CTCAAGTTATGAGAAGACGCTTGG-3'

WT-R (P6): 5'-TTCATTAACCTGTACTTGCTAGG-3'

#### Expected PCR Product:

Wildtype: N.A.

Targeted: ~406 bp

#### Reaction Mix:

| Component               | x1      |
|-------------------------|---------|
| ES cell genomic DNA     | 1.5 µl  |
| Forward primer(10 µM)   | 1.0 µl  |
| Reverse primer(10 µM)   | 1.0 µl  |
| P112 Taq DNA Polymerase | 12.5 µl |
| ddH <sub>2</sub> O      | 9.0 µl  |
| Total                   | 25.0 µl |

#### Cycling Condition:

| Step                 | Temp. | Time  | Cycles |
|----------------------|-------|-------|--------|
| Initial denaturation | 94 °C | 3 min |        |
| Denaturation         | 94 °C | 30 s  | 33 x   |
| Annealing            | 60 °C | 30 s  |        |
| Extension            | 72 °C | 30 s  |        |
| Additional extension | 72 °C | 5 min |        |
| storage temperature  | 25 °C |       |        |

#### PCR Result:

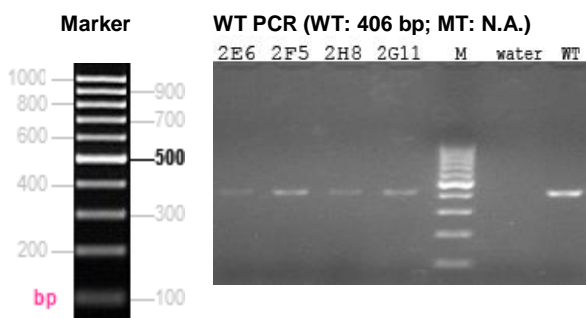

## 1.2. Result

Samples 2E6, 2F5, 2H8 and 2G11 have been confirmed as potentially targeted ES clones.

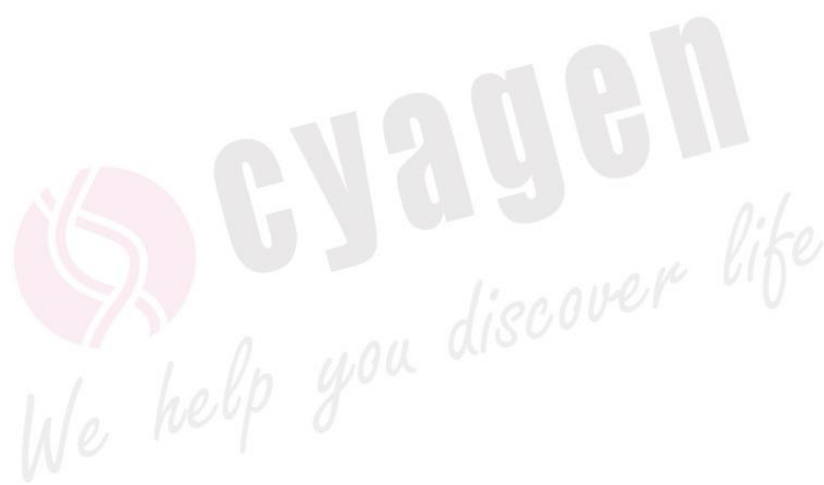



### 1.3. Southern Blot Analysis

The positive clones (2E6, 2F5, 2G11 and 2H8) from PCR screening were expanded and further characterized by Southern blot analysis. The Southern strategy is shown in the diagram below. The genomic DNA was digested with either *Scal* or *AflIII*, and hybridized using a Neo probe. The Neo probe is expected to detect the following DNA fragment from targeted allele in the Southern analysis: ~11.46 kb (with *Scal* digestion) and ~13.06 kb (with *AflIII* digestion).

**Diagram:**

Regions in the following diagram were selected for Southern blot.

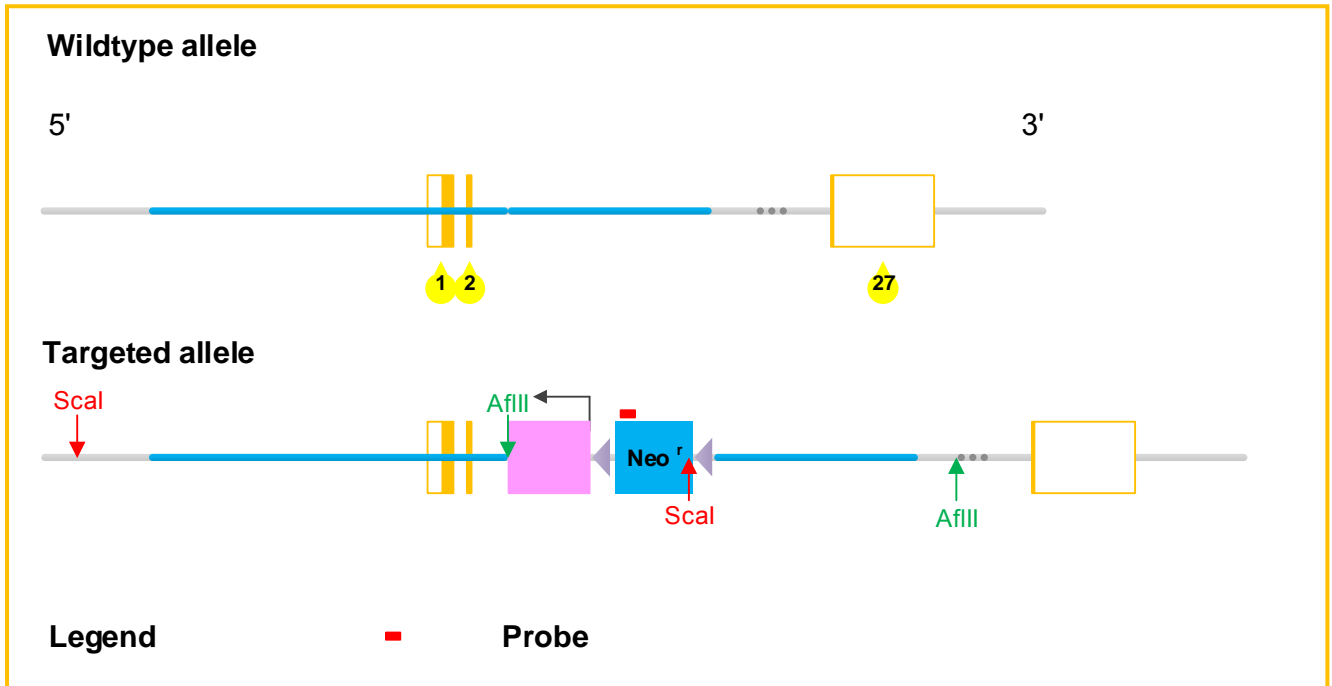

**Expected Fragment Sizes for Southern Blot:**

Neo Probe (containing 5'arm)-11.46 kb-*Scal*  
Neo Probe (containing 3'arm)-13.06 kb-*AflIII*

**Result:**

All of the four ES clones (2E6, 2F5, 2G11 and 2H8) were confirmed correct by Southern blot analysis.

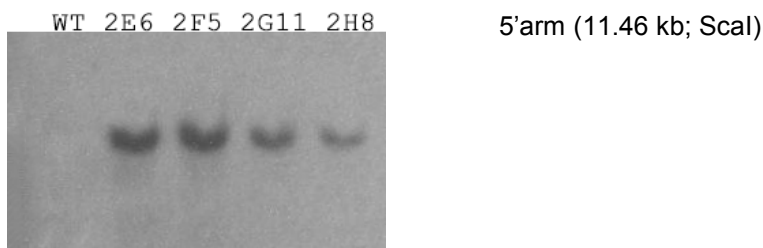

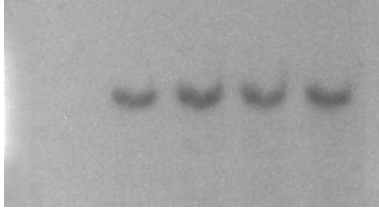

3'arm (13.06 kb; AflIII)

 **cyagen**  
*We help you discover life*

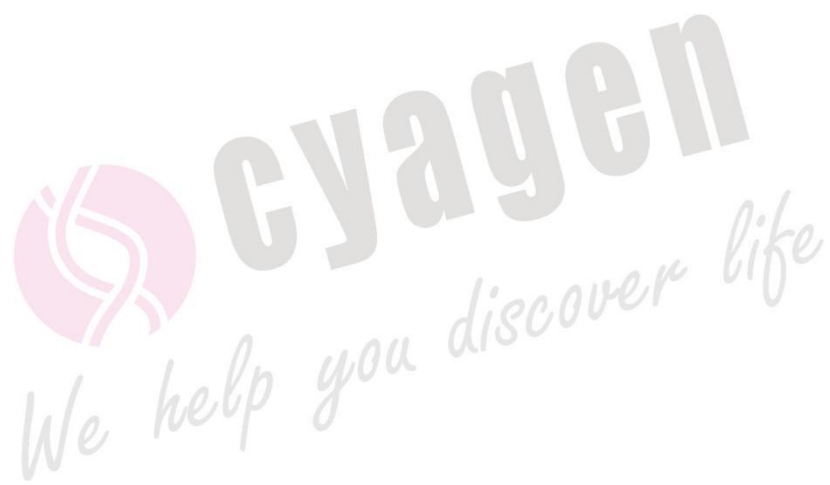

# Animal Report

Project: Mouse Uty Constitutive Knockin

## 1. Animal Generation

Targeted ES cell clone 2E6 was injected into C57BL/6 albino embryos, which were then re-implanted into CD-1 pseudo-pregnant females. Founder animals were identified by their coat color, their germline transmission was confirmed by breeding with C57BL/6 females and subsequent genotyping of the offspring. The Neo cassette is self-deleted in germ cells so the offspring were Neo cassette-free. Eight male heterozygous targeted mice were generated from clone 2E6 as final deliverables for this project.

| 2E6 ESC, F1 mice                  |   |
|-----------------------------------|---|
| 8 Males ♂                         | - |
| D.O.B: 09-03-2018                 |   |
| Mouse ID: 1, 2, 3, 4, 7, 8, 9, 10 |   |

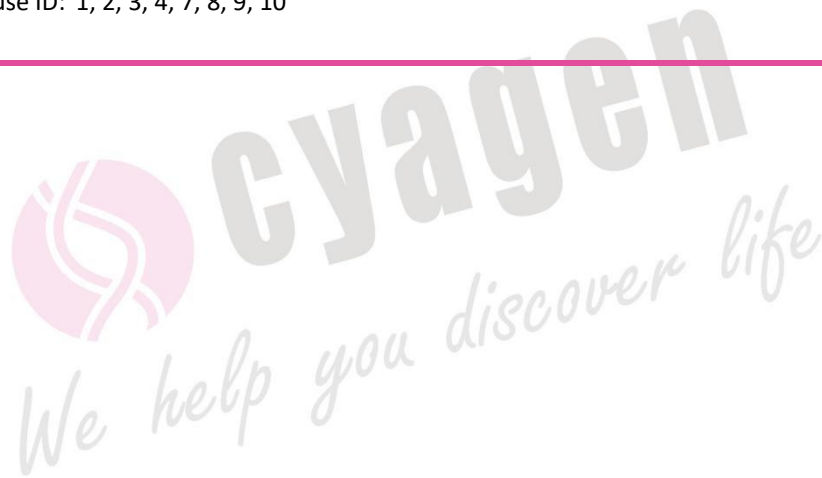

## 1.1. Genotyping Strategy

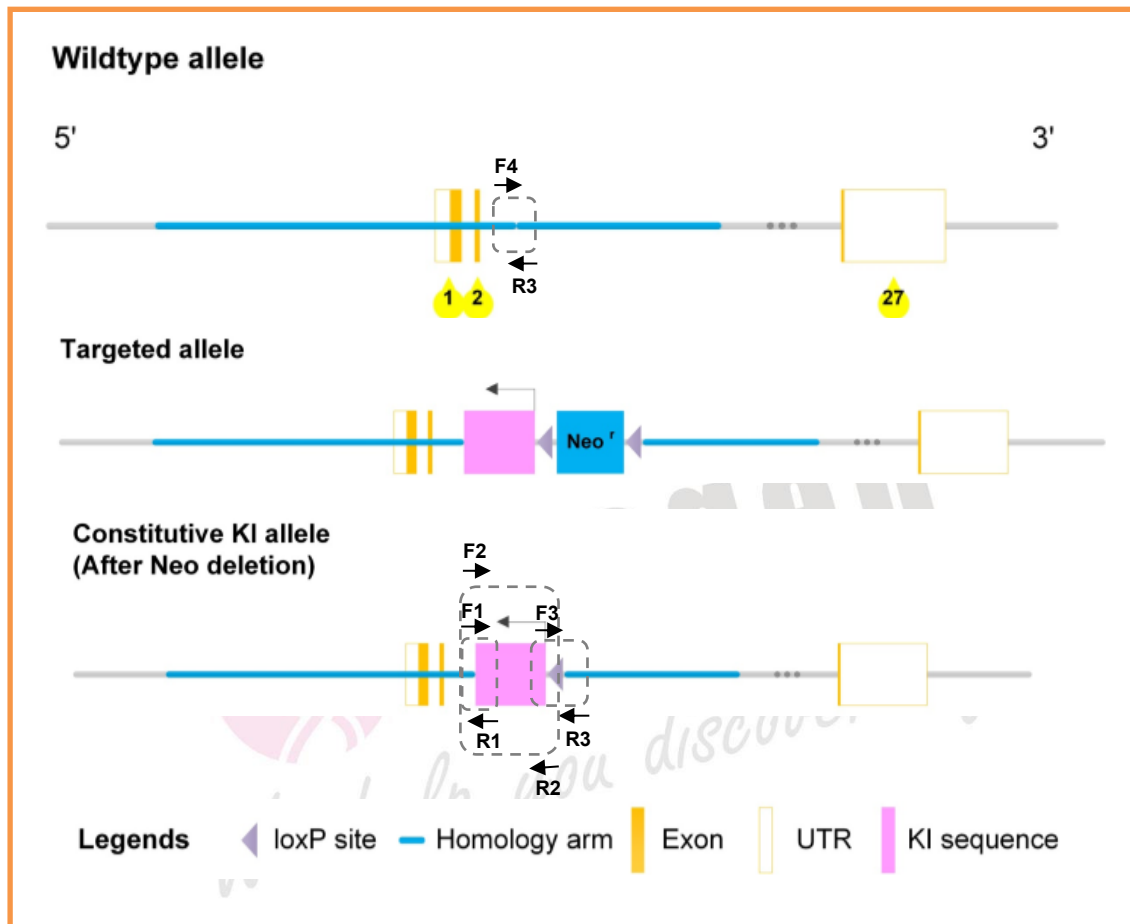

## 1.2. KI PCR

### Primers for KI PCR:

KI-F (F1): 5'-TGCTGGTATCAATCAAGATGGTGG-3'

KI-R (R1): 5'-AAGGACGAAACACCTGCAGAGAT-3'

### Expected PCR Product:

Wildtype: N.A.

Targeted: 194 bp

### Reaction Mix:

| Component              | x1      |
|------------------------|---------|
| Mouse genomic DNA      | 1.5 µl  |
| Forward primer (10 µM) | 1.0 µl  |
| Reverse primer (10 µM) | 1.0 µl  |
| Premix Taq Polymerase  | 12.5 µl |
| ddH <sub>2</sub> O     | 9.0 µl  |
| Total                  | 25.0 µl |

### Cycling Condition:

| Step                 | Temp. | Time  | Cycles |
|----------------------|-------|-------|--------|
| Initial denaturation | 94 °C | 3 min | 33 x   |
| Denaturation         | 94 °C | 30s   |        |
| Annealing            | 62 °C | 35s   |        |
| Extension            | 72 °C | 35s   |        |
| Additional extension | 72 °C | 5 min |        |

### 1.3. KI1 PCR

#### Primers for KI1 PCR:

KI1-F (F2): 5'-GGTATCAATCAAGATGGTGGCTT-3'

KI1-R (R2): 5'-ATGTATGCTATACGAAGTTATTAGGTC-3'

#### Expected PCR Product:

Wildtype: N.A.

Targeted: 1.2 kb

#### Reaction Mix:

| Component                  | ×1      |
|----------------------------|---------|
| DNA                        | 1.5 µL  |
| Forward primer (10 µM)     | 0.6 µL  |
| Reverse primer (10 µM)     | 0.6 µL  |
| dNTPs (2.5 mM)             | 1.8 µL  |
| 5X LongAmp Taq Reaction    | 3.0 µL  |
| LongAmp Taq DNA Polymerase | 0.9 µL  |
| ddH <sub>2</sub> O         | 6.6 µL  |
| Total                      | 15.0 µL |

#### Cycling Condition:

| Step                 | Temp. | Time   | Cycles |
|----------------------|-------|--------|--------|
| Initial denaturation | 94 °C | 3 min  | 33 x   |
| Denaturation         | 94 °C | 30s    |        |
| Annealing            | 60 °C | 30s    |        |
| Extension            | 65 °C | 50s/kb |        |
| Additional extension | 65 °C | 10min  |        |

### 1.4. Neo deletion PCR

#### Primers for Neo deletion PCR:

Neo-del-F (F3): 5'-GGCAGTGGGTGTTTCGTCCTT-3'

Neo-del-R (R3): 5'-AACTGTTTCATTTCCCCTCTCCTC-3'

Forward1 (F4): 5'-GGTAAGGAGATAAAGAGTTTCCGTAC-3'

#### Expected PCR Product:

Wildtype: 257 bp

Targeted: 448 bp

#### Reaction Mix:

| Component         | ×1     |
|-------------------|--------|
| Mouse genomic DNA | 1.5 µl |

|                        |                |
|------------------------|----------------|
| Neo-del-F (F3) (10 µM) | 1.0 µl         |
| Neo-del-R (R3) (10 µM) | 1.5 µl         |
| Forward1 (F4) (10 µM)  | 0.5 µl         |
| Premix Taq Polymerase  | 12.5 µl        |
| ddH <sub>2</sub> O     | 8.0 µl         |
| <b>Total</b>           | <b>25.0 µl</b> |

**Cycling Condition:**

| Step                 | Temp. | Time  | Cycles |
|----------------------|-------|-------|--------|
| Initial denaturation | 94 °C | 3 min | 33 x   |
| Denaturation         | 94 °C | 30s   |        |
| Annealing            | 62 °C | 35s   |        |
| Extension            | 72 °C | 35s   |        |
| Additional extension | 72 °C | 5 min |        |

**1.5. Result:**

Eight pups (1#, 2#, 3#, 4#, 7#, 8#, 9# and 10#) from clone 2E6 were identified positive by PCR screening for KI, KI1 and Neo deletion, the positive pups were reconfirmed by PCR screening for KI1 and Neo deletion.

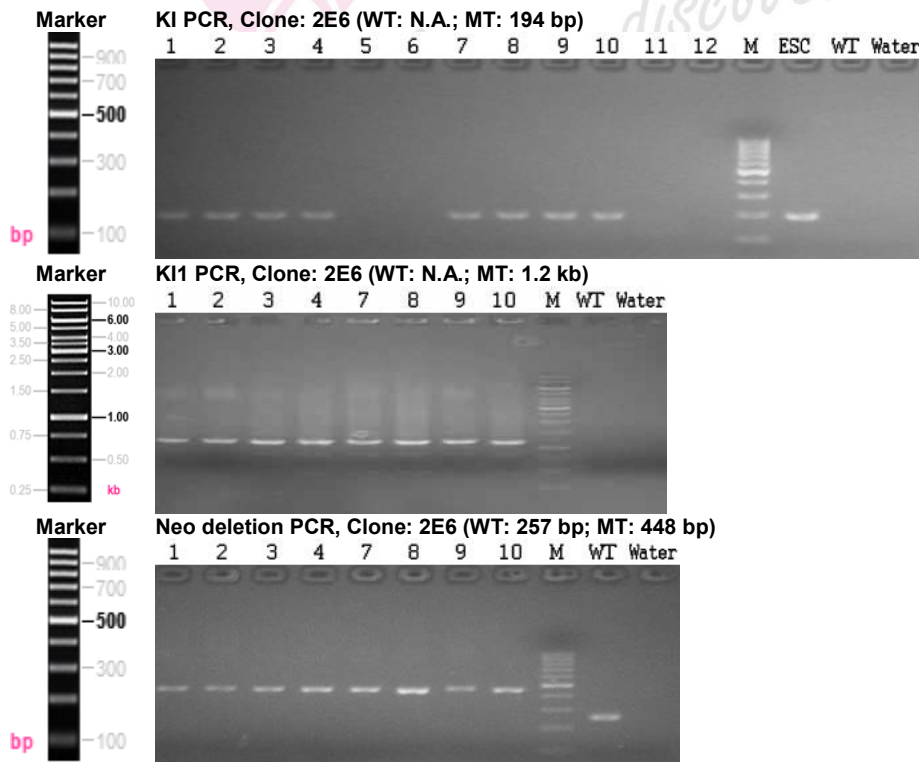

## 1.6. Suggested Breeding and Genotyping Assay for Tissue-specific knockin Mice Generation

**Step 1:** Inter-cross heterozygous loxP-flanked mice to generate homozygous loxP-flanked mice

Primers for targeted allele:

Neo-del-F (F3): 5'-GGCAGTGGGTGTTTCGTCCTT-3'

Neo-del-R (R3): 5'-AACTGTTTCATTTCCCCTCTCCTC-3'

Forward1 (F4): 5'-GGTAAGGAGATAAAGAGTTTCCGTAC-3'

Wildtype: 257 bp

Homozygotes: 448 bp

Heterozygotes: 448 bp/257 bp

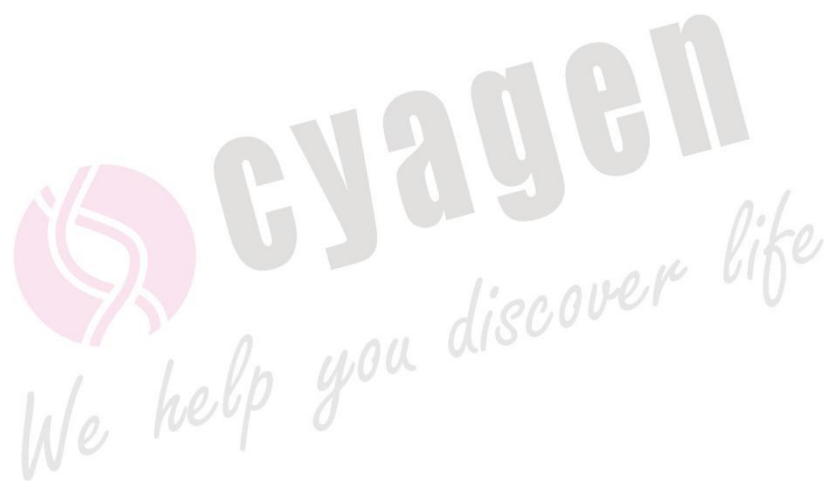





# Animal Report

Project: Mouse Uty Constitutive Knockin

## 1. Animal Generation

Targeted ES cell clone 2H8 was injected into C57BL/6 albino embryos, which were then re-implanted into CD-1 pseudo-pregnant females. Founder animals were identified by their coat color, their germline transmission was confirmed by breeding with C57BL/6 females and subsequent genotyping of the offspring. The Neo cassette is self-deleted in germ cells so the offspring were Neo cassette-free. Four male heterozygous targeted mice were generated from clone 2H8 as final deliverables for this project.

| 2H8 ESC, F1 mice     |   |
|----------------------|---|
| 4 Males ♂            | - |
| D.O.B: 09-02-2018    |   |
| Mouse ID: 1, 2, 3, 4 |   |

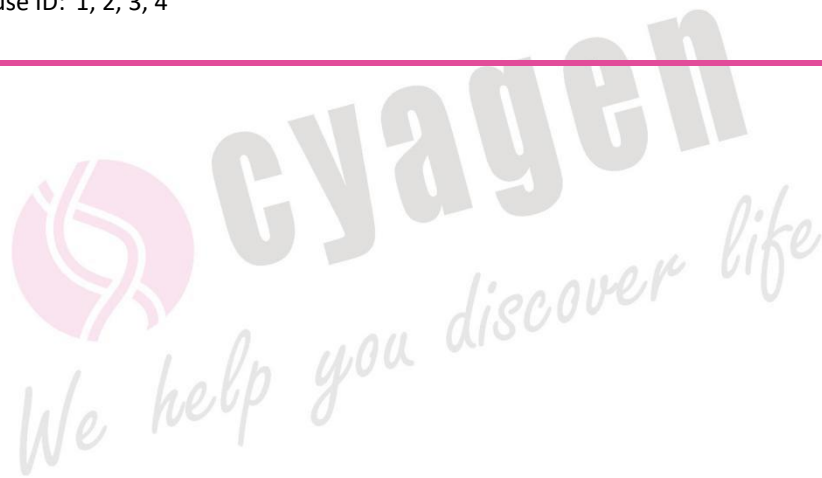

## 1.1. Genotyping Strategy



## 1.2. KI PCR

### Primers for KI PCR:

KI-F (F1): 5'-TGCTGGTATCAATCAAGATGGTGG-3'

KI-R (R1): 5'-AAGGACGAAACACCTGCAGAGAT-3'

### Expected PCR Product:

Wildtype: N.A.

Targeted: 194 bp

### Reaction Mix:

| Component              | x1      |
|------------------------|---------|
| Mouse genomic DNA      | 1.5 µl  |
| Forward primer (10 µM) | 1.0 µl  |
| Reverse primer (10 µM) | 1.0 µl  |
| Premix Taq Polymerase  | 12.5 µl |
| ddH <sub>2</sub> O     | 9.0 µl  |
| Total                  | 25.0 µl |

### Cycling Condition:

| Step                 | Temp. | Time  | Cycles |
|----------------------|-------|-------|--------|
| Initial denaturation | 94 °C | 3 min |        |
| Denaturation         | 94 °C | 30s   | 33 x   |
| Annealing            | 62 °C | 35s   |        |
| Extension            | 72 °C | 35s   |        |
| Additional extension | 72 °C | 5 min |        |

### 1.3. KI1 PCR

#### Primers for KI1 PCR:

KI1-F (F2): 5'-GGTATCAATCAAGATGGTGGCTT-3'

KI1-R (R2): 5'-ATGTATGCTATACGAAGTTATTAGGTC-3'

#### Expected PCR Product:

Wildtype: N.A.

Targeted: 1.2 kb

#### Reaction Mix:

| Component                  | ×1      |
|----------------------------|---------|
| DNA                        | 1.5 µL  |
| Forward primer (10 µM)     | 0.6 µL  |
| Reverse primer (10 µM)     | 0.6 µL  |
| dNTPs (2.5 mM)             | 1.8 µL  |
| 5X LongAmp Taq Reaction    | 3.0 µL  |
| LongAmp Taq DNA Polymerase | 0.9 µL  |
| ddH <sub>2</sub> O         | 6.6 µL  |
| Total                      | 15.0 µL |

#### Cycling Condition:

| Step                 | Temp. | Time   | Cycles |
|----------------------|-------|--------|--------|
| Initial denaturation | 94 °C | 3 min  |        |
| Denaturation         | 94 °C | 30s    | 33 x   |
| Annealing            | 60 °C | 30s    |        |
| Extension            | 65 °C | 50s/kb |        |
| Additional extension | 65 °C | 10min  |        |

### 1.4. Neo deletion PCR

#### Primers for Neo deletion PCR:

Neo-del-F (F3): 5'-GGCAGTGGGTGTTTCGTCCTT-3'

Neo-del-R (R3): 5'-AACTGTTTCATTTCCCCTCTCCTC-3'

Forward1 (F4): 5'-GGTAAGGAGATAAAGAGTTTCCGTAC-3'

#### Expected PCR Product:

Wildtype: 257 bp

Targeted: 448 bp

#### Reaction Mix:

| Component         | ×1     |
|-------------------|--------|
| Mouse genomic DNA | 1.5 µl |

|                        |                |
|------------------------|----------------|
| Neo-del-F (F3) (10 µM) | 1.0 µl         |
| Neo-del-R (R3) (10 µM) | 1.5 µl         |
| Forward1 (F4) (10 µM)  | 0.5 µl         |
| Premix Taq Polymerase  | 12.5 µl        |
| ddH <sub>2</sub> O     | 8.0 µl         |
| <b>Total</b>           | <b>25.0 µl</b> |

**Cycling Condition:**

| Step                 | Temp. | Time  | Cycles |
|----------------------|-------|-------|--------|
| Initial denaturation | 94 °C | 3 min | 33 x   |
| Denaturation         | 94 °C | 30s   |        |
| Annealing            | 62 °C | 35s   |        |
| Extension            | 72 °C | 35s   |        |
| Additional extension | 72 °C | 5 min |        |

**1.5. Result:**

Four pups (1#, 2#, 3# and 4#) from clone 2H8 were identified positive by PCR screening for KI, KI1 and Neo deletion, the positive pups were reconfirmed by PCR screening for KI1 and Neo deletion.

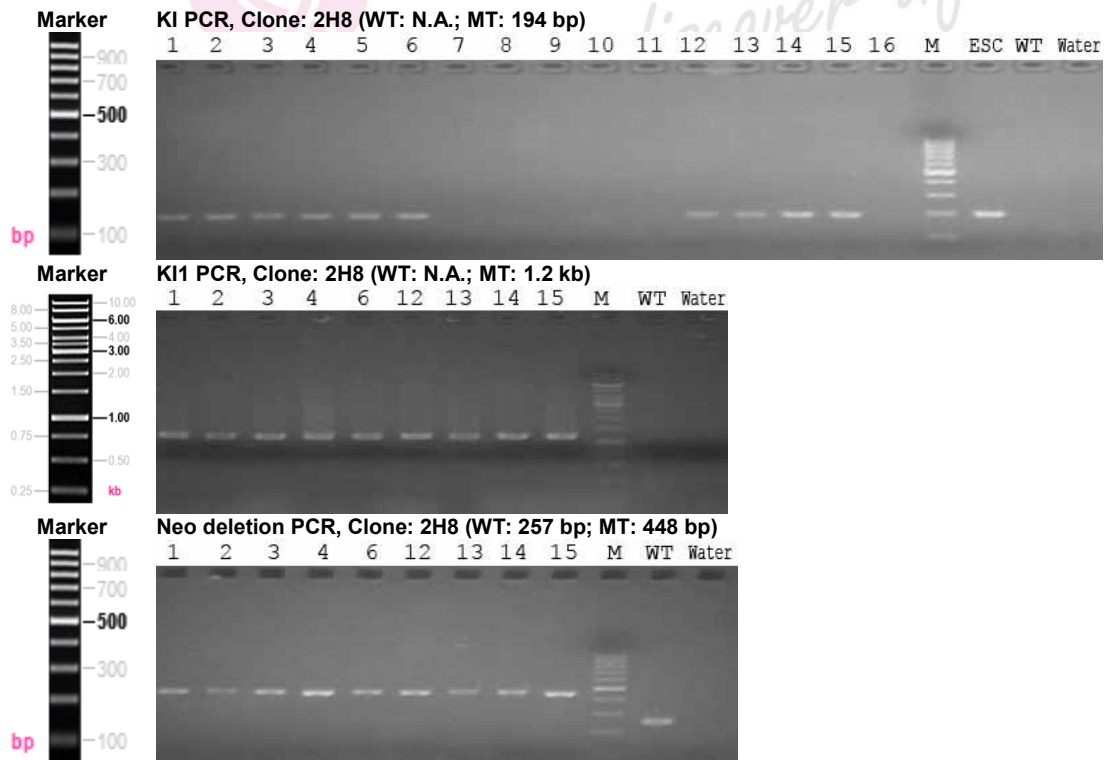

## 1.6. Suggested Breeding and Genotyping Assay

**Step 1:** Inter-cross heterozygous targeted mice to generate homozygous targeted mice

Primers for targeted allele:

Neo-del-F (F3): 5'-GGCAGTGGGTGTTTCGTCCTT-3'

Neo-del-R (R3): 5'-AACTGTTTCATTTCCCCTCCTC-3'

Forward1 (F4): 5'-GGTAAGGAGATAAAGAGTTTCCGTAC-3'

Wildtype: 257 bp

Homozygotes: 448 bp

Heterozygotes: 448 bp/257 bp



**Appendix Table S1. Oligonucleotides used in this study**

| Oligonucleotides | 5'→3'                      |
|------------------|----------------------------|
| Y forward        | GGCAGTGGGTGTTTCGTCCTT      |
| Y reverse        | AACTGTTTCATTTCCCCTCTCCTC   |
| Y-WT forward     | GGTAAGGAGATAAAGAGTTTCCGTAC |
| Cas9-M forward   | ACACCAGCACCAAAGAGGTG       |
| Cas9-M reverse   | GTAGGTCAGGGTGGTCACGA       |
| Cas9-WT forward  | AAGGGAGCTGCAGTGGAGTA       |
| Cas9-WT reverse  | CCGAAAATCTGTGGGAAGTC       |
| IY573F           | GTTCCCGATTGCAGCGTGCC       |
| IY573R           | CATCACAGAATGGAGATGGC       |
| IY574F           | GGCTACCAGAACAGACTGAA       |
| IY574R           | ATACAGGCAACCAGGCTCAC       |
| IY575F           | CCACACACACATGCCATAGC       |
| IY575R           | CTGGAGAGGCTATCTTAACTGG     |
| RG287F           | GACTTGCAGATACATCCCTTC      |
| RG285R           | CCAGAGTTTCCAAAAGGCTC       |

**Appendix Table S2. PCR set-ups**

| Reaction                      | Oligonucleotides used                              |
|-------------------------------|----------------------------------------------------|
| Y-locus genotyping            | Y forward + Y reverse                              |
| Sex determination             | Y-WT forward + Y reverse                           |
| <i>Cas9</i> -locus genotyping | Cas9-M forward + Cas9-WT forward + Cas9-WT reverse |
| <i>Atp5b</i> amplification    | IY573F + IY573R                                    |
| <i>Casp8</i> amplification    | IY575F + IY575R                                    |
| <i>Cdc20</i> amplification    | IY574F + IY574R                                    |
| <i>Atp5b</i> sequencing       | IY573F                                             |
| <i>Casp8</i> sequencing       | RG285R                                             |
| <i>Cdc20</i> sequencing       | RG287F                                             |
